# 1 Cytokinin perception in potato: New features of canonic players

2 Sergey N. Lomin<sup>1</sup>, Yulia A. Myakushina<sup>1</sup>, Oksana O. Kolachevskaya<sup>1</sup>, Irina A. Getman<sup>1</sup>, Dmitry  
3 V. Arkhipov<sup>1</sup>, Ekaterina M. Savelieva<sup>1</sup>, Dmitry I. Osolodkin<sup>1-3</sup> and Georgy A. Romanov<sup>1,4\*</sup>

4 <sup>1</sup> Timiryazev Institute of Plant Physiology, Russian Academy of Sciences, Botanicheskaya 35, 127276  
5 Moscow, Russia

6 <sup>2</sup> Institute of Poliomyelitis and Viral Encephalitides, Chumakov FSC R&D IBP RAS, Poselok Instituta  
7 Poliomeleta 8 bd. 1, Poselenie Moskovsky, Moscow 108819, Russia

8 <sup>3</sup> Institute of Pharmacy and Translational Medicine, Sechenov First Moscow State Medical University,  
9 Trubetskaya 8, 119991 Moscow, Russia

10 <sup>4</sup> Belozersky Institute of Physico-Chemical Biology, Lomonosov Moscow State University, Leninskie  
11 Gory 1, Bld. 40, 119992 Moscow, Russia

12 \* To whom correspondence should be addressed. E-mail: [gromanov@yahoo.com](mailto:gromanov@yahoo.com) or [gar@ippras.ru](mailto:gar@ippras.ru).

13 Tel.: 7(499)6785432

14

15 Running title: **Cytokinin perception in potato**

16

17

18 **Key words:** CHASE domain-containing histidine kinase, cytokinin, cytokinin receptor, cytokinin  
19 signaling, gene expression, hormone perception, potato, *Solanum tuberosum*.

20 Abbreviations: aa, amino acid; BA, 6-benzyladenine; CHASE, Cyclases/Histidine kinases Associated  
21 SENSory; CHK, CHASE domain-containing histidine kinases; CK, cytokinin; CRF, cytokinin response  
22 factor; cZ, *cis*-zeatin; DI, dimerization interface; DZ, dihydrozeatin; GFP, green fluorescent protein;  
23 HK, histidine kinase; iP, isopentenyladenine; LacZ, galactosidase; LD, long day; MSP, multistep  
24 phosphorelay; RR, response regulator; SNP, single nucleotide polymorphism; TD, thidiazuron; TM,  
25 transmembrane; tZ, *trans*-zeatin.

26

27 **Abstract**

28 Potato is the most economically important non-cereal food crop. Tuber formation in potato is regulated  
29 by phytohormones, cytokinins (CKs) in particular. The present work was aimed to study CK signal  
30 perception in potato. The sequenced potato genome of doubled monoploid Phureja was used for  
31 bioinformatic analysis and as a tool for identification of putative CK receptors from autotetraploid  
32 potato cv. Désirée. All basic elements of multistep phosphorelay (MSP) required for CK signal  
33 transduction were identified in Phureja genome, including three genes orthologous to three CK receptor  
34 genes (*AHK 2-4*) of Arabidopsis. As distinct from Phureja, autotetraploid potato contains at least two  
35 allelic isoforms of each receptor type. Putative receptor genes from Désirée plants were cloned,  
36 sequenced and expressed, and main characteristics of encoded proteins, firstly their consensus motifs,  
37 structure models, ligand-binding properties, and the ability to transmit CK signal, were determined. In  
38 all studied aspects the predicted sensor histidine kinases met the requirements for genuine CK receptors.  
39 Expression of potato CK receptors was found to be organ-specific and sensitive to growth conditions,  
40 particularly to sucrose content. Our results provide a solid basis for further in-depth study of CK  
41 signaling system and biotechnological improvement of potato.

## 42 Introduction

43 Potato is a widespread practically important crop, its tuber formation is controlled by phytohormones  
44 (reviewed in Aksenova *et al.*, 2012, 2014). Previous studies have shown that cytokinins (CKs) and  
45 auxins can accelerate and enhance potato tuber formation (Aksenova *et al.*, 2000; Romanov *et al.*, 2000;  
46 Roumeliotis *et al.*, 2012; Kolachevskaya *et al.*, 2015, 2017; Wang *et al.*, 2018). In non-tuberizing plants  
47 (tobacco, tomato), increased doses of active CKs stimulate morphogenesis, in many aspects resembling  
48 tuber formation (Guivarc'h *et al.*, 2002; Eviatar-Ribak *et al.*, 2013). CK signaling is also involved in the  
49 formation of nodules on the roots of legumes (reviewed in Frugier *et al.*, 2008; Miri *et al.*, 2016). CKs  
50 largely determine the nature of source-sink relationships in the whole plant, enhancing the attracting  
51 ability of the tubers (Abelenda and Prat, 2013). Elevated doses of CKs affect the overall architectonics  
52 of potato plants, suppressing the root development (Aksenova *et al.*, 2000). In addition, CKs participate  
53 in plant defense against biotic and abiotic adverse factors (Zwack and Rashotte, 2015; Brütting *et al.*,  
54 2017; Thu *et al.*, 2017). All the above indicates the important role of CKs in both the formation of  
55 tubers and the general development and resistance of potato plants.

56 The molecular mechanism of CK action on a plant cell has been established using mainly the  
57 Arabidopsis model (reviewed in Hutchison and Kieber, 2002, Hwang *et al.*, 2002; Kakimoto, 2003;  
58 Heyl and Schmölling, 2003; Sakakibara, 2006; Müller and Sheen, 2007). This mechanism is based on  
59 multistep phosphorelay (MSP) and uses three protein species to bring the CK signal up to the primary  
60 response genes: (i) transmembrane catalytic receptors with histidine kinase activity, (ii) mobile  
61 phosphotransmitters circulating between the cytoplasm and nucleus, and (iii) nuclear transcription  
62 factors, B-type response regulators. Other proteins (CRFs, pseudophosphotransmitters, A-type response  
63 regulators) affect the intensity of the CK signaling through the main transmission pathway (Kieber and  
64 Schaller, 2014, 2018).

65 Receptors are key factors in the perception and transduction of hormonal signals. In the case of CKs,  
66 receptors are sensory hybrid histidine kinases largely homologous to bacterial sensory histidine kinases,  
67 members of two-component signal transduction system. Known CK receptors are multidomain proteins  
68 located mainly in ER membranes (Caesar *et al.*, 2011; Lomin *et al.*, 2011, 2018; Wulfetange *et al.*,  
69 2011; Daudu *et al.*, 2017; Ding *et al.*, 2017) with N-terminal hormone-binding sensory module localized  
70 in the ER lumen and the central and C-terminal catalytic domains protruding in the cytosol (Steklov *et al.*,  
71 2013; Lomin *et al.*, 2018). Until now, CK receptors have been studied in a few vascular plant  
72 species, primarily and most detailed in Arabidopsis and maize (Kakimoto, 2003; Yonekura-Sakakibara  
73 *et al.*, 2004; Romanov *et al.*, 2006; Lomin *et al.*, 2011, 2012, 2015; 2018; Stolz *et al.*, 2011; Heyl *et al.*,  
74 2012; Steklov *et al.*, 2013; Wang *et al.*, 2014). In recent years, CK receptor studies have been extended  
75 to new species including rice (Choi *et al.*, 2012; Ding *et al.*, 2017), *Lotus japonicus* (Held *et al.*, 2014),

76 *Medicago truncatula* (Laffont *et al.*, 2015; Boivin *et al.*, 2016), oilseed rape (Kuderová *et al.*, 2015),  
77 *Nicotiana attenuata* (Schäfer *et al.*, 2015), and apple (Daudu *et al.*, 2017). These studies have  
78 demonstrated that the CK perception apparatus in some aspects is species-specific. Potato differs from  
79 most plant species by its ability to form tubers. This process, sensitive to various cues including CKs,  
80 makes the study of CK receptors of potato especially intriguing. So far, to our knowledge, there have  
81 been no scientific reports on such studies.

82 In this paper, we have examined potato CK receptors of a homozygous doubled monoploid Phureja  
83 (DM1-3 516 R44) whose genome was sequenced several years ago (Potato Genome Sequencing  
84 Consortium, 2011). Cloning and expression of receptor encoding genes were conducted using the  
85 commercial autotetraploid potato cv. Désirée. The presence of all necessary MSP elements in potato  
86 was demonstrated and main characteristics of CHASE domain-containing CK receptors, primarily their  
87 consensus motifs, 3D structure models, ligand-binding properties, and the ability to transmit the signal  
88 by MSP were ascertained. In contrast to the Phureja monoploid, distinct alleles for each of the three  
89 main forms of receptors were found in the Désirée potato. Expression of CK receptor genes was shown  
90 to be organ-specific and affected by sucrose. The obtained results might serve as a framework for new  
91 biotechnological approaches in improving potato productivity and stress resistance.

## 92 **Materials and methods**

### 93 *Sequence analysis*

94 Nucleotide/polypeptide sequences of CK receptors and other proteins related to the CK signaling were  
95 retrieved from databases NCBI (National Center for Biotechnology Information,  
96 <http://www.ncbi.nlm.nih.gov>), Phytozome 11 (<https://phytozome.jgi.doe.gov/pz/portal.html>), MSU  
97 Rice Genome Annotation Project Release 7 (<http://rice.plantbiology.msu.edu/>) and congenie.org  
98 (<http://congenie.org/>) using the BLASTP tool and *AHK2* (AT5G35750), *AHK3* (AT1G27320), *AHK4*  
99 (AT2G01830) and other CK-related genes of *Arabidopsis thaliana* as templates. Domain structure of  
100 proteins was determined with PROSITE (<http://prosite.expasy.org/>). Transmembrane domains were  
101 determined using MESSA service (<http://prodata.swmed.edu/MESSA/MESSA.cgi>) (Cong and Grishin,  
102 2012). Domain visualization was performed using the MyDomains – Image Creator service  
103 (<http://prosite.expasy.org/mydomains/>).

104 Phylogenetic analysis was performed using the MEGA6.0 (Tamura *et al.*, 2013). Alignment of  
105 nucleotide sequences (CDS, codon mode) was performed by ClustalW algorithm. Method of maximum  
106 likelihood was employed for phylogenetic reconstruction. The search for key amino acids (aa) in  
107 receptor domains by alignment and visualization of protein sequences was carried out in Clustal X2.1  
108 (Larkin *et al.*, 2007) and Jalview (Clamp *et al.*, 2004), respectively.

## 109 ***Homology modeling***

110 Search of templates for homology modeling was performed at SWISS-MODEL web-service  
111 (<https://swissmodel.expasy.org/>) (Biasini *et al.*, 2014). Modeling of potato (*Solanum tuberosum* L.)  
112 protein structures was accomplished in Modeller 9.19 (<https://salilab.org/modeller/>) (Sali and Blundell,  
113 1993) using *automodel* class for comparative modeling. For each protein, 200 models were built, and  
114 the best model was selected according to DOPE score value (Shen and Sali, 2006) as determined by  
115 Modeller. Templates for modeling and respective references (Müller-Dieckmann *et al.*, 1999; Hothorn  
116 *et al.*, 2011; Pekárová *et al.*, 2011; Bauer *et al.*, 2013; Mayerhofer *et al.*, 2015; Dubey *et al.*, 2016) are  
117 listed in Supplementary Table 1. After adding hydrogen atoms, models were energy minimized in UCSF  
118 Chimera 1.12 (<http://www.cgl.ucsf.edu/chimera/>) (Pettersen *et al.*, 2004) using AMBER ff14SB force  
119 field (Maier *et al.*, 2015) with 300 steps of steepest descent and 300 steps of conjugate gradient  
120 optimization; step size was 0.02 Å in both cases. Stereochemical quality of the models was assessed  
121 with ProCheck (Laskowski *et al.*, 1993) implemented in PDBsum Web service  
122 ([www.ebi.ac.uk/pdbsum](http://www.ebi.ac.uk/pdbsum)), ProSA-web (<https://prosa.services.came.sbg.ac.at/prosa.php>) (Wiederstein  
123 and Sippl, 2007) and QMEAN server (<https://swissmodel.expasy.org/qmean/help>) (Benkert *et al.*,  
124 2009). Visualization and superposition of the models were accomplished with UCSF Chimera.

## 125 ***Promoter analysis***

126 Promoter regions of *Arabidopsis thaliana* CK receptor genes (*AHK2*, *AHK3* and *AHK4*) were obtained  
127 from TAIR database (<https://www.arabidopsis.org>). Identification of promoter regions of CK receptor  
128 genes (*StHK2*, *StHK3* and *StHK4*) of potato was performed using Phytozome 11 and NCBI databases.  
129 DNA sequence of 1000 nucleotides long upstream the gene transcription start was taken as a promoter  
130 region. The search for *cis*-regulatory elements in promoters of studied genes was carried out using  
131 PLACE (<http://www.dna.affrc.go.jp/htdocs/PLACE/>) and PlantCARE  
132 (<http://bioinformatics.psb.ugent.be/webtools/plantcare/html/>) programs.

## 133 ***Receptor cloning***

134 Experiments were performed with autotetraploid potato (*Solanum tuberosum* L.) plantlets of Désirée  
135 variety. Plants were propagated by *in vitro* cloning on Murasige-Skoog agarose medium supplemented  
136 with 1.5% sucrose, at 20 °C and 16 h photoperiod in a controlled climate chamber with luminescent  
137 white light illumination (Kolachevskaya *et al.*, 2015, 2017). Total RNA was isolated from single potato  
138 shoots and treated with RNase-free DNase I (Thermo Scientific). Reverse transcription was performed  
139 with RevertAid™ according to the manufacturer's instructions (Thermo Scientific). Total DNA was  
140 isolated from shoots of individual plants using the CTAB method. The resulting cDNA and total DNA  
141 were used to amplify genes encoding predicted potato CK receptors with high-precision Phusion High-

142 Fidelity DNA polymerase (Thermo Scientific). The primer design was performed to amplify the full-  
143 length and truncated (sensory modules with flanking transmembrane helices) CDS of CK receptors  
144 according to sequences in the NCBI Genbank XM\_015303261.1, XM\_006352114.2 and  
145 XM\_006354988.2. Primer sequences are shown in Supplementary Table S2. PCR products were gel  
146 purified and cloned using the PCR Cloning Kit (Thermo Scientific) into the plasmid pJET1.2/blunt  
147 according to the manufacturer's instructions followed by transformation of *E. coli* strain DH10B  
148 (Invitrogen). *StHK4* was amplified using *StHK4\_truncated* primers. The product was inserted into the  
149 construction of pB7FWG2-AHK3 instead of *AHK3*. The latter was removed at the BcuI and EcoRI  
150 restriction sites (Lomin *et al.*, 2015). The nucleotide sequences of the cloned genes were confirmed by  
151 DNA sequencing.

152 *StHK2* and *StHK3* sequences were subcloned into the plasmid pDONR<sup>TM</sup>221 in BP reaction with  
153 Gateway® BP Clonase® II Enzyme mix (Thermo Scientific). Then, using the LR reaction with the LR  
154 Clonase® II Plus enzyme (Thermo Scientific), the cloned sequence was transferred into the expression  
155 vector pB7FWG2 (Karimi *et al.*, 2007) where it was fused at the 3'-terminus to the *eGFP* gene. For  
156 expression in *E. coli*, *StHK2* and *StHK4* were amplified using primers *StHK2\_COLD* and  
157 *StHK4\_COLD*, respectively (Supplementary Table S2). The product was then inserted into the plasmid  
158 pCOLD IV (Takara BioInc.) at the XhoI and XbaI restriction sites for *StHK2* and SacI and EcoRI  
159 restriction sites for *StHK4*, followed by transformation of the *E. coli* DH10B strain.

### 160 ***Transient expression of receptor genes in tobacco plants***

161 The transient transformation of tobacco (*Nicotiana benthamiana* Domin) leaves was accomplished  
162 according to Sparkles *et al.* (2006). Eight week-old tobacco plants were infiltrated with a mixture of  
163 *Agrobacterium tumefaciens* carrying CK receptor genes fused to GFP and the *A. tumefaciens* helper  
164 strain p19 (Voinnet *et al.*, 2003), and the expression of receptor genes was checked after 5–6 days on  
165 fluorescence microscope Axio Imager Z2 (Carl Zeiss Microscopy GmbH) before leaves were proceeded  
166 further for microsome isolation.

### 167 ***Plant membrane isolation***

168 All manipulations were done at 4 °C. Tobacco leaves 6 days after infiltration were homogenized in  
169 buffer (3 ml per 1 g of fresh weight) containing 100 mM Tris-HCl (pH 8.0), 2 mM Na<sub>2</sub>-EDTA, 50 mM  
170 KCl, 1 mM DTT and 1 mM PMSF. The homogenate was filtrated through Miracloth (Calbiochem, San  
171 Diego, USA), and the filtrate was centrifuged for 5 min at 5000 g. Then supernatant was centrifuged for  
172 40 min at 15000 g. The microsome pellet was resuspended in 50 mM KCl, 10% glycerol and then  
173 microsome suspension was stored at -70 °C.

### 174 ***Hormone binding assays***

175 Ligand binding studies were performed in PBS as described previously (Romanov *et al.*, 2005; Lomin *et*  
176 *al.*, 2015). Studies of pH influence on hormone binding were performed in 50 mM MES-KOH (pH 5–7)  
177 or Tris-HCl (pH 7–9) buffers with 50 mM KCl.  $K_d$  for [<sup>3</sup>H]tZ binding to different receptors were  
178 determined in saturation assays followed by data analysis in Scatchard plots.

### 179 ***Assessment of receptor functionality***

180 Plasmids pCOLD IV with *StHK* coding sequences were transferred for the expression into *E. coli* strain  
181 KMI001 (Suzuki *et al.*, 2001). In this strain, HK receptor→YojN→RcsB→*cps::lacZ* pathway can be  
182 activated by external CKs (Takeda *et al.*, 2001). The activation of the signaling pathway was monitored  
183 by measuring  $\beta$ -galactosidase activity of *E. coli* cells. Cultivation of clones on Petri dishes containing 40  
184 mM glucose, 40  $\mu\text{g ml}^{-1}$  X-gal, 100  $\mu\text{M}$  IPTG, 50  $\mu\text{g ml}^{-1}$  ampicillin at 15 °C was performed for 4 days.  
185 The individual clones were then streaked onto new Petri dishes containing 40 mM glucose, 40  $\mu\text{g ml}^{-1}$   
186 X-gal, 100  $\mu\text{M}$  IPTG, 50  $\mu\text{g ml}^{-1}$  ampicillin  $\pm$  *trans*-zeatin at a concentration of 0.5  $\mu\text{M}$ . The clones were  
187 grown for 3 days at 15 °C. Expression of the *cps::lacZ* construct was evaluated by blue staining of  
188 bacterial clones.

### 189 ***Gene expression analysis***

190 Potato (*Solanum tuberosum* cv. Désirée) plants were cultivated under standard *in vitro* conditions at a  
191 long (16 h) day for 5-6 weeks on liquid MS medium containing 1.5% or 5% sucrose. For hormone  
192 treatment, the medium was replaced with the same one supplemented with *N*<sup>6</sup>-benzyladenine (BA, 1  
193  $\mu\text{M}$ ). Tubes were inverted several times to assure uniform plant wetting and then incubated for 1 h under  
194 standard conditions. Finally plant organs (leaves, stems, roots, tubers) were isolated and immediately  
195 frozen in liquid nitrogen. Control plants were treated in a same way only without hormone. Total RNA  
196 was isolated by Trizol method (Brenner *et al.*, 2005), this RNA served template for cDNA synthesis by  
197 reverse transcription (Invitrogen). All RNA samples were treated with RNase-free DNase I. The  
198 resulting cDNA was checked for the genomic DNA contamination by PCR with primers differentiating  
199 cDNA and genomic DNA. The band derived from genomic DNA was absent in the separating gel.  
200 Expression of genes encoding predicted proteins of CK signaling system was determined by qRT PCR.  
201 Potato housekeeping genes *StEF1 $\alpha$*  (elongation factor 1- $\alpha$ , AB061263) and *StCYC* (cyclophilin,  
202 AF126551) were used as reference genes (Nicot *et al.*, 2005). Sequences of primers for qRT PCR are  
203 shown in Supplementary Table S2.

### 204 ***Statistical analysis***

205 Statistical analysis was accomplished using the Student's t-test. *P*-value <0.05 was considered as  
206 statistically significant. In tables and graphics, mean values with standard errors are presented.

## 207 **Results**

### 208 **Monoploid Phureja genome analysis**

#### 209 *Potato has everything necessary for CK signaling via the MSP pathway*

210 The search for protein sequences and encoding genes involved in CK signaling was performed on the  
211 basis of the duplicated potato monoploid Phureja genome (Potato Genome Sequencing Consortium,  
212 2011). In general, all potential components of the canonical CK signaling system described in  
213 Arabidopsis and other plant species with a sequenced genome (Kieber and Schaller, 2014; 2018) were  
214 identified in potato too. Potential CK-related genes found in potato encode homologs of CHASE  
215 domain-containing histidine kinases (CHK), phosphotransmitters (HPt), and response regulators of A  
216 (RR-A) and B (RR-B) types (Table 1). This indicates the MSP functioning in potato cells for CK signal  
217 transduction, involving proteins of a two-component system. In the potato monoploid proteome three  
218 predicted protein-coding sequences XP\_015158747.1, XP\_006352176.1 and XP\_006355050.1,  
219 orthologous to Arabidopsis receptors AHK2, AHK3 and CRE1/AHK4, respectively, were detected. By  
220 analogy with the Arabidopsis orthologs, these proteins were annotated in NCBI as StHK2, StHK3, and  
221 StHK4. They correspond to mRNA sequences XM\_015303261.1, XM\_006352114.2 and  
222 XM\_006354988.2. Deduced proteins StHK2, StHK3, and StHK4 share 59.35%, 67.75%, and 67.52%  
223 sequence similarity with the Arabidopsis orthologs. The lengths of *StHK2*, *StHK3* and *StHK4* genes are  
224 5345, 4216, and 3810 bp, respectively, and predicted proteins are 1263, 1032, and 992 aa long  
225 (Table 1).

#### 226 *Phylogenetic analysis classified StHKs into three clades*

227 The phylogenetic analysis was performed to compare the conserved and unique features of predicted  
228 potato CK receptors with the features of Arabidopsis, rice, tomato, and other species receptors (Fig. 1).  
229 CK receptors of flowering plants can be grouped into three main clades, corresponding to the  
230 Arabidopsis AHK2, AHK3, and CRE1/AHK4 receptors (Pils and Heyl, 2009; Lomin *et al.*, 2012;  
231 Steklov *et al.*, 2013). Predicted potato and tomato receptors are unequivocally distributed among these  
232 three clades. Evolutionally, they are closer to Arabidopsis than to rice receptors, what was expected  
233 since potato, tomato and Arabidopsis are dicots whereas rice is a monocot.

#### 234 *Multiple alignments revealed common and unique features of StHKs*



235 We investigated the modular architecture of predicted potato CK receptors. The exon-intron structure of  
236 the cognate genes as well as occurrence and position of functional domains in the receptor proteins were  
237 analyzed. Known CK receptors share a common organization, including (from N to C termini) sensory  
238 module with CHASE domain, catalytic module with HisKA and ATPase domains, and receiver module  
239 with pseudoreceiver and receiver domains (Kakimoto, 2003; Steklov *et al.*, 2013). The sensory module  
240 is flanked by predicted transmembrane (TM)  $\alpha$ -helices. There is always a single TM-helix C-terminal  
241 (downstream) of module while the number of TM-helices N-terminal (upstream) of module is variable.  
242 Number of upstream TM-helices is usually highest (up to 3-4) in AHK2 clade members, lowest (1) in  
243 the AHK4 clade and intermediate in the AHK3 clade (Steklov *et al.*, 2013). The domain structure of  
244 putative potato receptors fully corresponds to the canonical one (Fig. 2).

245 At the N-termini of potato CK receptors, the number of upstream TM helices is 3, 2, and 1 in StHK2,  
246 StHK3, and StHK4, respectively. CK receptor genes share similar exon-intron organization. The exon  
247 boundaries in the receptor genes of different species coincide in most cases. A multiple alignment of  
248 receptor sequences from potato, rice and Arabidopsis was carried out (Fig. 3). All canonical motifs  
249 present in known CK receptors were also found in the potato orthologs. H, N, G1, F, and G2 motifs  
250 were identified in the catalytic module, and DD-D-K motifs – in the receiver domain of putative potato  
251 receptors. Conserved sequences contain phosphorylatable histidine (H) and aspartate (D) residues.  
252 StHK2 has a conserved aspartate in its receiver-like domain (Rec-like), similarly to orthologs from  
253 Arabidopsis (AHK2), tomato (SIHK2) and rice (OsHK3 and OsHK5). However, the overall DD-D-K-  
254 like motifs in Rec-like domains have little in common with the respective sequences in Rec domains  
255 (Fig. 3C).

256 Highly conserved motifs were earlier found in sensory modules and adjacent downstream TM-  
257 segments of CK receptors (Steklov *et al.*, 2013). These motifs are obviously important for ligand  
258 binding and transmembrane signal transfer. In putative potato receptors, these motifs are also present,  
259 although with some peculiarities. In particular, StHK2 has a deviation from the canonic motif in  
260 CHASE domain, where either Glu or Asp is located at position 90, while StHK2 has Gln at this position.  
261 StHK3 has a deviation at the position 177, strongly conserved in the HK3 clade. This position is  
262 occupied by Phe in the canonic motif, while in StHK3 by Leu. In the general HK motif, either Phe or  
263 Tyr is located at position 177. StHK4 is distinguished by positions 83 (Ala→Ser) and 172 (Tyr→Phe) in  
264 conserved motifs. Note that counterparts of Gln90, Leu177 and Ser83 are present also in tomato  
265 genome, so these substitutions may be characteristic of Solanaceae family. Phe172 seems to be unique  
266 for potato.

267 ***StHK functional domains adopt canonical 3D structures***

268 We have built homology models of all StHK domains (Fig. 4). High structural similarity of predicted  
269 potato receptors with their Arabidopsis orthologs was observed as expected. Key functional regions,  
270 such as ligand-binding sites, phosphorylation sites, ATP-binding sites and dimerization interfaces, are  
271 particularly conserved. Sensory modules consisting of dimerization, PAS and pseudo-PAS domains (the  
272 latter two comprise the CHASE domain) are very similar in Arabidopsis and potato. StHK2 and StHK3  
273 differ from StHK4 by an insertion of 14 and 17 residues, respectively, in the region adjacent to the C-  
274 terminus of  $\alpha$ 3-helix (the first  $\alpha$ -helix of the PAS domain). This insertion apparently does not participate  
275 in the hormone recognition site and is unlikely to directly affect the ligand-binding properties of the  
276 protein. Similar insertions are also present in AHK2 and AHK3 receptors from Arabidopsis.

277 The catalytic modules include HisKA domains and H-ATPase domains. HisKA domains are formed  
278 by two  $\alpha$ -helices and contain dimerization interface and phosphorylation site (conserved histidine). H-  
279 ATPase domains including ATP-binding sites have a sophisticated structure based on  
280 parallel/antiparallel  $\beta$ -strands and  $\alpha$ -helices. A large insert at the  $\beta$ 2- $\beta$ 3 linker (more than 50 residues  
281 long) differs CK receptors from bacterial histidine kinases and H-ATPase domain of the ethylene  
282 receptor. This insert is located, however, on the opposite side from the ATP binding site. This structural  
283 feature distinguishes not only potato receptors but also CK receptors of other species.

284 The CKII histidine kinase receiver domain (RD), used as the template for CK receptor RD, adopts a  
285 fold typical for the REC (or CheY-like) superfamily proteins. It is formed by five  $\alpha$ -helices and  $\beta$ -sheet  
286 composed of five parallel  $\beta$ -strands. Two  $\alpha$ -helices are located on one side of the  $\beta$ -sheet, and remaining  
287 three on the other side. The same fold is characteristic for the model of the Arabidopsis CRE1/AHK4  
288 receptor RD. As distinct from this, an additional small helix is present in the region between  $\alpha$ 3 helix  
289 and  $\beta$ 4 strand in the models of potato and other Arabidopsis receptors AHK2 and AHK3 RDs.  
290 Conserved aspartate residue, serving as a phosphate acceptor in RD, is located at the N terminus of the  
291  $\beta$ 3 sheet (Fig. 4).

292 Deviations from canonic CHASE motifs in sensory modules of putative potato CK receptors do not  
293 seem to alter 3D structures of the modules. Unusual Gln90 resides far from the ligand-binding pocket of  
294 StHK2, with sidechain directed to the dimerizing interface. Although the unusual Leu177 of StHK3 is  
295 localized in the ligand-binding site, its sidechain is oriented to the opposite direction. The substitutions  
296 in StHK4 seem to be more functional than in other predicted potato receptors. Ser73 and Phe172 are  
297 localized in the ligand-binding pocket periphery and their sidechains are oriented inwards. Hence, these  
298 latter substitutions might somehow influence the ligand specificity of the receptor.

## 299 **Experimental studies on autotetraploid potato cv. Désirée**

### 300 ***Potato cv. Désirée possesses multiple alleles of StHK genes***

301 A homozygous doubled monoploid Phureja (DM1-3 516 R44) is an artificial form of potato  
302 phenotypically differing from commonly known diploid/tetraploid potato varieties (Potato Genome  
303 Sequencing Consortium, 2011). Such differences in phenotype are underlain by considerable sequence  
304 and structural genome variations between potato haplotypes. Therefore, the results of genome study of  
305 monoploid Phureja do not mirror exactly more complex genomes of common potato cultivars.

306 Our experimental study of CK receptors was performed using the autotetraploid potato cv. Désirée,  
307 widely used for commercial and scientific purposes (Aksenova *et al.*, 2000; Kolachevskaya *et al.*, 2015).  
308 We cloned the putative receptor genes using primers designed according to Phureja gene sequence data.  
309 Distinct from Phureja genome, at least six genes of putative CK receptors were cloned from cDNA of  
310 Désirée plants. All these genes share a typical module/domain structure characteristic of hybrid sensor  
311 histidine kinases (Figs. 2–4). According to their sequence, encoded proteins fall pairwise into three  
312 known clades of CK receptors (Table 2, Fig. 1). Thus, each form of CK receptors from potato cv.  
313 Désirée consists of at least two close isoforms encoded by natural receptor alleles. Sequencing of cloned  
314 genes revealed traits of both similarity and divergence between Phureja and Désirée plants. The  
315 nucleotide sequences of HK2-clade members *StHK2a* and *StHK2b* differ from the orthologous Phureja  
316 sequence by five and four nucleotides (5 and 4 SNPs), respectively. At the protein level, StHK2a and  
317 StHK2b have three and two aa substitutions, respectively, relative to Phureja receptor (Table 2).

318 Of two cloned genes of HK3-clade, *StHK3a* is identical to its counterpart of Phureja, whereas  
319 *StHK3b* differs by 20 SNPs together with a 3-nucleotide deletion. These differences result in the  
320 absence of one aa and nine aa substitutions in StHK3b compared to its Phureja ortholog. Similar data  
321 were obtained for HK4-clade: *StHK4a* was fully identical to that of Phureja whereas *StHK4b* differs by  
322 28 SNPs and a 3-nucleotide deletion. Correspondingly, StHK4b differs from its Phureja ortholog, as  
323 well as from StHK4a, by deletion of one aa and substitution of 13 ones (Table 2). Analysis of aa  
324 sequences of the proteins showed that all putative histidine kinases of Désirée potato retain the domains  
325 and consensus sequences typical for CK receptors, despite aa substitutions (Fig. 2). This indicates that  
326 all proteins encoded by the cloned *StHK* genes of tetraploid potato plants can successfully function as  
327 CK receptors.

### 328 ***StHKs have typical CK-binding properties except StHK3 with distinct ligand specificity***

329 To analyze ligand-binding properties of the receptors, a recently developed plant membrane assay  
330 system (Lomin *et al.*, 2015) was used. Predicted potato CK receptor genes were cloned into pB7FWG2  
331 vectors for transient expression in tobacco leaves. In the case of *StHK2* and *StHK4* genes, the full-length  
332 cDNA sequences were expressed, but in the case of *StHK3*, expression of the full-length receptor failed  
333 for unknown reasons. Instead of full-length receptor, we cloned a genomic sequence of the StHK3a

334 sensory module flanked with transmembrane domains. From the transiently transformed tobacco leaves,  
335 a microsomal fraction enriched with individual potato receptors was obtained. The binding assays were  
336 conducted using this fraction and tritium-labeled CK. In aggregate, we tested four putative receptors  
337 belonging to all three clades: StHK2a, StHK3a (sensory module, further designated as StHK3a<sub>SM</sub>),  
338 StHK4a, and StHK4b.

339 First, we determined the pH-dependence of hormone binding to these receptors within the pH range  
340 of 5–9 (Fig. 5). All StHKs exhibited maximal *trans*-zeatin binding at the neutral-mildly basic pH:  
341 StHK2a at pH 7.5, StHK3a<sub>SM</sub> at pH 7, StHK4a at pH 7.5–8, and StHK4b at pH 8–9. All StHKs showed  
342 a decrease in ligand binding at acid pH: StHK2a and StHK3a<sub>SM</sub> reduced their binding at pH 5 compared  
343 to pH 7 by a factor of 2 and 5, respectively. Ligand binding by StHK4a and StHK4b decreased at pH 5  
344 about three times compared to maximal values. Although the StHK3a was represented in this study only  
345 by its sensory module, a control experiment with the full-length StHK2a and its sensory module showed  
346 a similar pH-dependence of hormone binding (data not shown). This means that an isolated sensory  
347 module is sufficient to determine the pH-dependence of hormone binding by the receptor.

348 The interaction of a hormone with a receptor is characterized by the equilibrium dissociation constant  
349 ( $K_d$ ) of the ligand-receptor complex.  $K_d$  values were determined by the dose-dependent binding of  
350 labeled *trans*-zeatin to StHKs, the results were processed by the Scatchard method (Supplementary Fig.  
351 S7) (Lomin and Romanov, 2008). All StHKs demonstrated high affinity for *trans*-zeatin, with similar  $K_d$   
352 at the nanomolar level (Table 3). The determined  $K_d$  values were close to the values of analogous  
353 constants for CK receptors of other species (Lomin *et al.*, 2012, 2015, Kuderová *et al.*, 2015) and were  
354 well correlated with concentrations of active CKs *in planta* (Hirose *et al.*, 2008) including potato  
355 (Kolachevskaya *et al.*, 2017, 2018).

356 Different CKs are usually present in the plant: *trans*- and *cis*-zeatins, isopentenyladenine, and  
357 dihydrozeatin. In addition to natural CKs, there are many synthetic ones. Receptors exhibit different  
358 affinities for these compounds (Lomin *et al.*, 2015; Savelieva *et al.*, 2018). We studied the ligand  
359 specificity of putative receptors in competitive experiments where binding of labeled CK was carried  
360 out in the presence of various concentrations of certain unlabeled ligands. Based on the obtained  
361 competition curves, the apparent  $K_d$  values were determined for each ligand as described (Lomin and  
362 Romanov, 2008). We analyzed the interaction of StHKs with six CKs, including five natural ones as  
363 well as synthetic urea-type CK thidiazuron (Table 3). The ligand specificity of StHKs showed much in  
364 common. All analyzed proteins had a high and nearly equal affinity for *trans*-zeatin and  
365 isopentenyladenine, apparent  $K_d$  ranging from 2.1 to 5.2 nM. All StHKs bound *cis*-zeatin significantly  
366 weaker, with  $K_d$  over 100 nM. *N*<sup>6</sup>-Benzyladenine exhibited an intermediate affinity with  $K_d$  ranging  
367 from 40 to 60 nM. Regarding the two remaining CKs, StHK proteins showed significant differences.  
368 StHK3a<sub>SM</sub> bound dihydrozeatin with  $K_d$  ~21 nM, much stronger than other putative potato receptors ( $K_d$

369 ~170-230 nM). StHK2 and StHK3<sub>aSM</sub> showed a high affinity for thidiazuron ( $K_d=1.4$  nM and 2.3 nM,  
370 respectively), whereas its affinity for StHK4a and StHK4b was much lower ( $K_d=12.6$  nM and 17.2 nM,  
371 respectively). The CK affinity ranking for StHKs was as follows: StHK2, TD>iP=tZ>BA>cZ>DZ;  
372 StHK3, TD>iP=tZ>DZ>BA>cZ; StHK4, iP=tZ>TD>BA>cZ>DZ. The preference profiles of StHK2  
373 and StHK3<sub>aSM</sub> differ by DZ position, and from (almost identical) StHK4 isoforms by TD position. The  
374 greatest differences (in TD and DZ positions) were revealed between StHK3 and StHK4. Although  
375 StHK3a was represented in this study only by its sensory module, previous data showed that sensory  
376 module is sufficient to characterize the ligand preference of the full-length receptor (Stolz *et al.*, 2011;  
377 Lomin *et al.*, 2015).

### 378 ***StHKs are able to trigger signaling via MSP***

379 The ability of the putative potato receptors to trigger CK signaling was tested on *E. coli*  $\Delta$ rscC mutant  
380 devoid of its own RcsC hybrid histidine kinase and equipped with the *cps:LacZ* construct with the *LacZ*  
381 reporter gene driven by *cps* promoter (Suzuki *et al.*, 2001; Takeda *et al.*, 2001). This design allows  
382 assessment of the ability of hybrid histidine kinases to initiate signaling over the MSP pathway.  
383 Activation of MSP signaling in the bacteria leads to the expression of the reporter galactosidase (LacZ),  
384 whose activity is manifested by blueing of clones growing on X-Gal-supplemented medium. We  
385 expressed the cloned genes of the putative potato CK receptors in *E. coli*  $\Delta$ rscC. In the clones  
386 expressing the StHKs but not in the control clone, blue staining was observed (Fig. 6). The degree of  
387 blueing was greatly increased in the presence of CK. It confirms the ability of the cloned potato proteins  
388 to transmit the CK signal to the primary response genes via the canonic MSP pathway.

### 389 ***StHKs exhibit in planta organ-specific expression pattern which has unique properties***

390 To assess the functionality of a gene *in vivo*, it is important to know the level and pattern of its  
391 expression in the living organism. We studied the expression of putative CK receptor genes in organs of  
392 potato plants grown *in vitro* under conditions favorable for either vegetative growth (1.5% sucrose) or  
393 for tuber formation (5% sucrose). The mRNA contents of the *StHK2*, *StHK3* and *StHK4* genes was  
394 determined by the qRT PCR method. For the quantitative comparison of the expression profiles, intra-  
395 exon primers were selected for each tested gene (Supplementary Table S1). These primers were  
396 complementary to both alleles of the same clade owing to a great similarity of these gene sequences.  
397 The relative amounts of putative receptors of distinct clades in potato organs were judged by comparing  
398 the levels of transcripts of the cognate genes.

399 Expression levels differed significantly depending on *StHK* group, organ and growth conditions (Fig.  
400 7). Expression patterns were different in plants grown on media with low (1.5%) or high (5%) sucrose

401 content. In the case of 1.5% sucrose medium, the highest expression of *StHK3* genes was observed in  
402 roots, while in the case of 5% sucrose medium, the maximal expression of *StHK3* tended to occur in  
403 leaves. In the low sucrose grown plants, *StHK4* gene was much weaker expressed in leaves than in  
404 stems or roots, whereas at the higher sucrose content levels of *StHK4* expression in different organs  
405 were more equalized. In the *StHK2* group, noticeable organ-specific differences were detected when  
406 plants were grown on 5%, but not on 1.5% sucrose. The lowest expression level of all StHK groups was  
407 usually observed in tubers compared to other organs (Fig. 7A).

408 Within each organ, expression of *StHK3* undoubtedly dominated in leaves, regardless of the sucrose  
409 content (Fig. 7B). Expression of *StHK2* and especially *StHK4* genes in leaves was much weaker. In  
410 stems grown on 1.5% sucrose, expression of *StHK4* prevailed, while the lowest expression was  
411 characteristic of *StHK2* genes. In the roots, expression of *StHK2* genes was relatively weak, whereas the  
412 genes of *StHK3* and *StHK4* clades were expressed actively and in almost equal proportions. A dissimilar  
413 pattern of expression was observed in plants grown on 5% sucrose. Here in addition to leaves, in all  
414 other organs tested (stems, roots, tubers) the expression of *StHK3* alleles prevailed too, though to a  
415 lesser extent than in leaves. Compared to the low-sucrose medium, 5% sucrose increased the relative  
416 expression of *StHK2* genes (in stems and roots), while decreasing the level of *StHK4* expression. Thus,  
417 unlike Arabidopsis, in potato plants there is evidently no dominance of StHK4 receptors in roots, on the  
418 contrary, StHK3 receptors seem to dominate there when cultivating plants on tuber-inductive 5%  
419 sucrose. A common feature of potato and Arabidopsis is a very low expression of HK4 orthologs in  
420 leaves.

421 Although the primers used for qRT PCR did not distinguish closely related isoforms of the CK  
422 receptor genes, it is still possible to approximately estimate the relative expression of these alleles. To  
423 achieve this goal, data on cDNA clone numbers can be used (Table 2). Within the same clade, relative  
424 quantity of cDNA clones harboring a distinct isoform should reflect the relative occurrence of cognate  
425 mRNAs. According to the last column of Table 2 corresponding to aerial part of potato seedlings, two  
426 mRNA isoforms of the HK2 clade were in the 1:1 ratio; among mRNA isoforms of HK3 clade, *StHK3a*  
427 was approx. two-fold more frequent than *StHK3b*; in the case of HK4 clade, *StHK4b* was expressed  
428 about one order of magnitude more intensively than *StHK4a*.

#### 429 ***StHK promoter activity is hardly affected by CKs, in accordance with low cis-element content***

430 Treatment of potato plants with  $N^6$ -benzyladenine had a small effect on the expression of the CK  
431 receptor genes, and the hormonal impact, when occurred, was only local and not always reproduced. At  
432 1.5% sucrose, the upregulation (on average, 2.5-fold) of *StHK4* expression was regularly recorded, but  
433 only in leaves (Fig. 8). It can be stated that the CK effect on the expression of potato receptor genes, if

434 any, is mostly limited to *StHK4* and depends on both organ/tissue type and conditions of plant  
435 cultivation.

436 To validate the results of CK treatment experiments, the effect of CK administration on the transcript  
437 level of the genes of type A response regulator (*RR-A*) genes was analyzed. These genes in other species  
438 (*Arabidopsis*, maize) represent genes of primary response to CK, so it might be expected that in potato  
439 too they would be responsive to CK. Indeed, our experiments showed a rapid and reliable increase in the  
440 expression of *StRR-A* genes, in contrast to the receptor genes, after plant treatment with BA (Fig. 8).  
441 These results prove the reliability of design and implementation of experiments and, on the other hand,  
442 corroborate the common mode of functioning of the CK signaling system in different plant species.

443 Analysis of promoter structures of the studied genes (Fig. 9) was mostly consistent with the gene  
444 expression data. Long CK-sensitive *cis*-regulatory elements or blocks of 4 or more short elements near  
445 the transcription start (~300 bp area) were found in promoters of almost all *StRR-A*, but not *StHK* genes.  
446 Among the receptor genes, only *StHK4* has a block of 3 short CK-sensitive *cis*-elements near the start of  
447 transcription. It is possible that this block determines the responsiveness of *StHK4* to CK under certain  
448 conditions, as shown in Fig. 8. Though this promoter analysis was accomplished using the genome  
449 sequence of var. Phureja, the promoter sequencing from Désirée plants showed an identity of the  
450 promoters from these two potato lines.

## 451 Discussion

452 Plant morphogenesis, in particular tuberization, is based on spatiotemporal cell proliferation and  
453 differentiation. The main biological effect of plant hormones CKs is the induction of cell divisions  
454 (Sakakibara, 2006; Romanov, 2009), therefore CKs are important participants of morphogenetic  
455 processes. Indeed, with regard to potato development, CKs were reported to accelerate and scale up  
456 tuber formation (Aksenova *et al.*, 2000; Romanov *et al.*, 2000). In non-potato plants, CKs alone were  
457 able to induce the emergence of tuber-like structures (Guivarc'h *et al.*, 2002; Eviatar-Ribak *et al.*, 2013;  
458 Frugier *et al.*, 2008; Miri *et al.*, 2016). Apart the impact on the formation of tubers, CKs are known to  
459 regulate overall plant architecture, biomass partitioning as well as resistance to biotic and abiotic stress-  
460 factors (Aksenova *et al.*, 2000; Abelenda and Prat, 2013; Zwack and Rashotte, 2015; Brütting *et al.*,  
461 2017; Thu *et al.*, 2017). All these point to the importance to investigate CK signaling system in plants,  
462 in particular in tuber crops like potato.

463 Herein, we present first results of detailed study of CK receptors from potato plants. Two different  
464 potato forms were examined: doubled monoploid Phureja and tetraploid potato of Désirée variety.  
465 Phureja plants possess, like *Arabidopsis*, three CK receptor orthologs. By contrast, in Désirée plants two  
466 allelic forms of each receptor type (*StHK2a/b*, *StHK3a/b* and *StHK4a/b*) have been found belonging to

467 the three known phylogenetic clades. Our data indicated that this receptor abundance is characteristic of  
468 each individual Désirée plant. It is not excluded that the real number of receptor alleles in potato plant is  
469 somewhat higher. Within each group, receptor isomers differ by a few aa substitutions which do not  
470 affect most conserved motifs. However, some consensus motifs in sensory module (Steklov *et al.*, 2013)  
471 are distinctive in receptors of potato. The reason for such peculiar properties is not yet clear. Molecular  
472 modeling was employed to build models of the structure for all main domains of potato CK receptors. In  
473 general, potato CK receptors share similar domain structure with crystallized hybrid histidine kinases  
474 from other species. Note that such a complete characterization of all main domains of CK receptors is  
475 presented for the first time.

476 The ligand-binding properties of individual potato receptors have been determined: affinity constants  
477 for active CKs, pH-dependence of ligand binding, ligand specificity. Two of the studied receptors  
478 (StHK3a and StHK4a) are identical in potato cv. Désirée and var. Phureja. All receptors have high  
479 affinity for tZ, significantly lower for BA, and relatively low for cZ. StHK3 differs from other potato  
480 receptors by relatively high affinity for DZ. The ligand specificity of StHK2 and StHK4 has much in  
481 common with that of Arabidopsis orthologs, whereas StHK3 binds iP and BA much stronger than  
482 AHK3, the affinity of StHK3 for iP and tZ is similar. Thus, the ligand-binding properties of StHK3  
483 differ from those of orthologs in Arabidopsis, maize and oilseed rape. All receptors bind CK stronger in  
484 basic (pH 7–9) than acidic (pH 5–7) pH range. This evidences in favor of the intracellular functioning of  
485 potato CK receptors (Romanov *et al.*, 2018). The functionality of cloned potato receptors was confirmed  
486 by testing their ability to transduce CK signal via MSP up to the target gene.

487 The predominant expression of the *StHK3* genes was revealed in leaves, as well as in other organs of  
488 plants grown on 5% sucrose, although the degree of dominance of StHK3 was less pronounced in stems,  
489 roots and tubers. When plants were grown on 1.5% sucrose, *StHK4* expression predominated in stems  
490 while in roots the expression levels of *StHK3* and *StHK4* were relatively high and nearly equal. In  
491 contrast to other species (Romanov, 2009; Lomin *et al.*, 2012), no prevalent expression of HK4  
492 orthologs in roots was found. Exogenous CK had little effect on the expression of CK receptors in  
493 potato plants except *StHK4* which can be rapidly upregulated in leaves. Analysis of promoter structures  
494 showed a correlation between the occurrence of *cis*-regulatory elements and the CK sensitivity of gene  
495 expression.

496 Thus, the totality of our results left no doubt that studied StHK proteins are genuine CK receptors in  
497 potato. The observed unique structural features refine and broaden our notion on the properties of CK  
498 receptors. The revealed peculiarities of CK perception apparatus in potato might be associated with the  
499 ability of this crop to produce tubers. It may be suggested that tuber initiation can be associated with the  
500 local/temporary increase in CK signaling in stolon tips. The obtained results create a solid basis for



501 further in-depth study of the role of the CK signaling system in potato ontogenesis and provide new  
502 biotechnological tools to optimize hormonal regulation of tuber formation.

### 503 **Supplementary data**

504 Table S1. Sequence identity of modeled receptor domains and corresponding templates.

505 Table S2. Primers used in this work.

### 506 **Acknowledgements**

507 This work was supported by the Russian Science Foundation, grants no. 14-14-01095 (before 31.12  
508 2016, bioinformatic and initial experimental data) and 17-74-20181 (in 2017, conclusive experimental  
509 results). We thank T. Schmülling for providing opportunity to perform some experiments in his  
510 laboratory.

## References

- Abelenda JA, Prat S.** 2013. Cytokinins: determinants of sink storage ability. *Current Biology* **23**, R561–R563.
- Aksenova NP, Konstantinova TN, Golyanovskaya SA, Kossmann J, Willmitzer L, Romanov GA.** 2000. Transformed potato plants as a model for studying the hormonal and carbohydrate regulation of tuberization. *Russian Journal of Plant Physiology* **47**, 370–379.
- Aksenova NP, Konstantinova TN, Golyanovskaya SA, Sergeeva LI, Romanov GA.** 2012. Hormonal regulation of tuber formation in potato plants. *Russian Journal of Plant Physiology* **59**, 451–466.
- Aksenova NP, Sergeeva LI, Kolachevskaya OO, Romanov GA.** 2014. Hormonal regulation of tuber formation in potato. In: Ramawat KG, Merillon JM, eds. *Bulbous Plants. Biotechnology*. New York, Oxon UK: CRC Press, 3–36.
- Bauer J, Reiss K, Veerabagu M, Heunemann M, Harter K, Stehle T.** 2013. Structure-function analysis of *Arabidopsis thaliana* histidine kinase AHK5 bound to its cognate phosphotransfer protein AHP1. *Molecular Plant* **6**, 959–970.
- Benkert P, Kunzli M, Schwede T.** 2009. QMEAN server for protein model quality estimation. *Nucleic Acids Research* **37**, W510–W514.
- Biasini M, Bienert S, Waterhouse A, et al.** 2014. SWISS-MODEL: modelling protein tertiary and quaternary structure using evolutionary information. *Nucleic Acids Research* **42**, W252–W258.
- Boivin S, Kazmierczak T, Brault M, Wen J, Gamas P, Mysore KS, Frugier F.** 2016. Different cytokinin histidine kinase receptors regulate nodule initiation as well as later nodule developmental stages in *Medicago truncatula*. *Plant Cell and Environment* **39**, 2198–2209.
- Brenner WG, Romanov GA, Köllmer I, Bürkle L, Schmülling T.** 2005. Immediate-early and delayed cytokinin response genes of *Arabidopsis thaliana* identified by genome-wide expression profiling reveal novel cytokinin-sensitive processes and suggest cytokinin action through transcriptional cascades. *The Plant Journal* **44**, 314–333.
- Brütting C, Schäfer M, Vanková R, Gase K, Baldwin IT, Meldau S.** 2017. Changes in cytokinins are sufficient to alter developmental patterns of defense metabolites in *Nicotiana attenuata*. *The Plant Journal* **89**, 15–30.
- Caesar K, Thamm AM, Witthöft J, Elgass K, Huppenberger P, Grefen C, Horak J, Harter K.** 2011. Evidence for the localization of the *Arabidopsis* cytokinin receptors AHK3 and AHK4 in the endoplasmic reticulum. *Journal of Experimental Botany* **62**, 5571–5580.
- Choi J, Lee J, Kim K, Cho M, Ryu H, An G, Hwang I.** 2012. Functional identification of OsHk6 as a homotypic cytokinin receptor in rice with preferential affinity for iP. *Plant and Cell Physiology* **53**, 1334–1343.

- Clamp M, Cuff J, Searle S.M, Barton GJ.** 2004. The Jalview Java alignment editor. *Bioinformatics* **20**, 426–427.
- Cong Q, Grishin NV.** 2012. MESSA: MEta server for sequence analysis. *BMC Biology* **10**, 82.
- Daudu D, Allion E, Liesecke F, et al.** 2017. CHASE-containing histidine kinase receptors in apple tree: from a common receptor structure to divergent cytokinin binding properties and specific functions. *Frontiers in Plant Science* **8**, 1614.
- Ding W, Tong H, Zheng W, Ye J, Pan Z, Zhang B, Zhu S.** 2017. Isolation, characterization and transcriptome analysis of a cytokinin receptor mutant *Oscck1* in rice. *Frontiers in Plant Science* **8**, 88.
- Dubey BN, Lori C, Ozaki S, Fucile G, Plaza-Menacho I, Jenal U, Schirmer T.** 2016. Cyclic di-GMP mediates a histidine kinase/phosphatase switch by noncovalent domain cross-linking. *Science Advances* **2(9)**, e1600823.
- Eviatar-Ribak T, Shalit-Kaneh A, Chappell-Maor L, Amsellem Z, Eshed Y, Lifschitz E.** 2013. A cytokinin-activating enzyme promotes tuber formation in tomato. *Current Biology* **23**, 1057–1064.
- Frugier F, Kosuta S, Murray JD, Crespi M, Szczyglowski K.** 2008. Cytokinin: secret agent of symbiosis. *Trends in Plant Sciences* **13**, 115–120.
- Guivarc’h A, Rembur J, Goetz M, Roitsch T, Noin M, Schmülling T, Chriqui D.** (2002). Local expression of the *ipt* gene in transgenic tobacco (*Nicotiana tabacum* L. cv. SR1) axillary buds establishes a role for cytokinins in tuberization and sink formation. *Journal of Experimental Botany* **53**, 621–629.
- Held M, Hou H, Miri M, et al.** 2014. *Lotus japonicus* cytokinin receptors work partially redundantly to mediate nodule formation. *The Plant Cell* **26**, 678–694.
- Heyl A, Schmülling T.** 2003. Cytokinin signal perception and transduction. *Current Opinion in Plant Biology* **6**, 480–488.
- Heyl A, Riefler M, Romanov GA, Schmülling T.** 2012. Properties, functions and evolution of cytokinin receptors. *European Journal of Cell Biology* **91**, 246–256.
- Hirose N, Takei K, Kuroha T, Kamada-Nobusada T, Hayashi H, Sakakibara H.** 2008. Regulation of cytokinin biosynthesis, compartmentalization and translocation. *Journal of Experimental Botany* **59**, 75–83.
- Hothorn M, Dabi T, Chory J.** 2011. Structural basis for cytokinin recognition by *Arabidopsis thaliana* histidine kinase 4. *Nature Chemical Biology* **7**, 766–768.
- Hutchison CE, Kieber JJ.** 2002. Cytokinin signaling in *Arabidopsis*. *The Plant Cell* **14 Suppl**, S47–S59.
- Hwang I, Chen HC, Sheen J.** 2002. Two-component signal transduction pathways in *Arabidopsis*. *Plant Physiology* **129**, 500–515.

- Kakimoto T.** 2003. Perception and signal transduction of cytokinins. *Annual Review of Plant Biology* **54**, 605–627.
- Karimi M, Depicker A, Hilson P.** 2007. Recombinational cloning with plant Gateway vectors. *Plant Physiology* **145**, 1144–1154.
- Kieber JJ, Schaller GE.** 2014. Cytokinins. *The Arabidopsis Book* **12**. American Society of Plant Biologists, e0168.
- Kieber JJ, Schaller GE.** 2018. Cytokinin signaling in plant development. *Development* **145**. doi: 10.1242/dev.149344.
- Kolachevskaya OO, Alekseeva VV, Sergeeva LI, Rukavtsova EB, Getman IA, Vreugdenhil D, Buryanov YI, Romanov GA.** 2015. Expression of auxin synthesis gene *tms1* under control of the tuber-specific promoter enhances potato tuberization *in vitro*. *Journal of Integrative Plant Biology* **57**, 734–744.
- Kolachevskaya OO, Sergeeva LI, Floková K, Getman IA, Lomin SN, Alekseeva VV, Rukavtsova EB, Buryanov YI, Romanov GA.** 2017. Auxin synthesis gene *tms1* driven by tuber-specific promoter alters hormonal status of transgenic potato plants and their responses to exogenous phytohormones. *Plant Cell Reports* **36**, 419–435.
- Kolachevskaya OO, Sergeeva LI, Floková K, Getman IA, Lomin SN, Romanov GA.** 2018. Core features of the hormonal status in potato plants. *Plant Signaling and Behavior*, in press.
- Kuderová A, Gallová L, Kuricová K, Nejedlá E, Čurdová A, Micenková L, Plíhal O, Šmajš D, Spíchal L, Hejátko J.** 2015. Identification of AHK2- and AHK3-like cytokinin receptors in *Brassica napus* reveals two subfamilies of AHK2 orthologues. *Journal of Experimental Botany* **66**, 339–353.
- Laffont C, Rey T, André O, Novero M, Kazmierczak T, Debellé F, Bonfante P, Jacquet C, Frugier F.** 2015. The CRE1 cytokinin pathway is differentially recruited depending on *Medicago truncatula* root environments and negatively regulates resistance to a pathogen. *PLoS One* **10**, e0116819.
- Larkin MA, Blackshields G, Brown NP, et al.** 2007. Clustal W and Clustal X version 2.0. *Bioinformatics* **23**, 2947–2948.
- Laskowski RA, MacArthur MW, Moss DS, Thornton JM.** 1993. PROCHECK - a program to check the stereochemical quality of protein structures. *Journal of Applied Crystallography*, **26**, 283–291.
- Lomin SN, Krivosheev DM, Steklov MYu, Arkhipov DV, Schmülling T, Romanov GA.** 2015. Plant membrane assays with cytokinin receptors underpin the unique role of free cytokinin bases as biologically active ligands. *Journal of Experimental Botany* **66**, 1851–1863.
- Lomin SN, Krivosheev DM, Steklov MY, Osolodkin DI, Romanov GA.** 2012. Receptor properties and features of cytokinin signaling. *Acta Naturae* **4**, 31–45.

- Lomin SN, Myakushina YuA, Arkhipov DV, Leonova OG, Popenko VI, Schmülling T, Romanov GA.** 2018. Studies of cytokinin receptor-phosphotransmitter interaction provide evidences for the initiation of cytokinin signalling in the endoplasmic reticulum. *Functional Plant Biology* **45**, 192–202.
- Lomin SN, Romanov GA.** 2008. The analysis of hormone-receptor interaction. Theoretical and practical aspects. *Russian Journal of Plant Physiology* **55**, 259–273.
- Lomin SN, Yonekura-Sakakibara K, Romanov GA, Sakakibara H.** 2011. Ligand-binding properties and subcellular localization of maize cytokinin receptors. *Journal of Experimental Botany* **62**, 5149–5159.
- Maier JA, Martinez C, Kasavajhala K, Wickstrom L, Hauser K.E, Simmerling C.** 2015. ff14SB: improving the accuracy of protein side chain and backbone parameters from ff99SB. *Journal of Chemical Theory and Computation* **11**, 3696–3713.
- Mayerhofer H, Panneerselvam S, Kaljunen H, Tuukkanen A, Mertens HD, Mueller-Dieckmann J.** 2015. Structural model of the cytosolic domain of the plant ethylene receptor 1 (ETR1). *Journal of Biological Chemistry* **290**, 2644–2658.
- Miri M, Janakirama P, Held M, Ross L, Szczyglowski K.** 2016. Into the root: how cytokinin controls rhizobial infection. *Trends in Plant Sciences* **21**, 178–86.
- Müller B, Sheen J.** 2007. Advances in cytokinin signaling. *Science* **318**, 68–69.
- Müller-Dieckmann HJ, Grantz AA, Kim SH.** 1999. The structure of the signal receiver domain of the *Arabidopsis thaliana* ethylene receptor ETR1. *Structure* **7**, 1547–1556.
- Nicot N, Hausman J-F, Hoffman L, Evers D.** 2005. Housekeeping gene selection for real-time RT-PCR normalization in potato during biotic and abiotic stress. *Journal of Experimental Botany* **56**, 2907–2914.
- Pekárová B, Klumpler T, Třísková O, et al.** 2011. Structure and binding specificity of the receiver domain of sensor histidine kinase CKII from *Arabidopsis thaliana*. *The Plant Journal* **67**, 827–839.
- Pekárová B, Szmitkowska A, Dopitová R, Degtjarik O, Zídek L, Hejátko J.** 2016. Structural aspects of multistep phosphorelay-mediated signaling in plants. *Molecular Plant* **9**, 71–85.
- Pettersen EF, Goddard TD, Huang CC, Couch GS, Greenblatt DM, Meng EC, Ferrin TE.** 2004. UCSF Chimera – a visualization system for exploratory research and analysis. *Journal of Computational Chemistry* **25**, 1605–1612.
- Pils B, Heyl A.** 2009. Unraveling the evolution of cytokinin signaling. *Plant Physiology* **151**, 782–791.
- Potato Genome Sequencing Consortium.** 2011. Genome sequence and analysis of the tuber crop potato. *Nature* **475**, 189–195.

- Romanov GA.** 2009. How do cytokinins affect the cell? *Russian Journal of Plant Physiology* **56**, 268–290.
- Romanov GA, Aksenova NP, Konstantinova TN, Golyanovskaya SA, Kossmann J, Willmitzer L.** 2000. Effect of indole-3-acetic acid and kinetin on tuberization parameters of different cultivars and transgenic lines of potato *in vitro*. *Plant Growth Regulation* **32**, 245–251.
- Romanov GA, Lomin SN, Schmülling T.** 2006. Biochemical characteristics and ligand-binding properties of *Arabidopsis* cytokinin receptor AHK3 compared to CRE1/AHK4 as revealed by a direct binding assay. *Journal of Experimental Botany* **57**, 4051–4058.
- Romanov GA, Lomin SN, Schmülling T.** 2018. Cytokinin signaling: from the ER or from the PM? That is the question! *New Phytologist* **218**, 41–53.
- Romanov GA, Spíchal L, Lomin SN, Strnad M, Schmülling T.** 2005. A live cell hormone-binding assay on transgenic bacteria expressing a eukaryotic receptor protein. *Analytical Biochemistry* **347**, 129–134.
- Roumeliotis E, Kloosterman B, Oortwijn M, Kohlen W, Bouwmeester HJ, Visser RGF, Bachem CWB.** 2012. The effects of auxin and strigolactones on tuber initiation and stolon architecture in potato. *Journal of Experimental Botany* **63**, 4539–4548.
- Sakakibara H.** 2006. Cytokinins: activity, biosynthesis, and translocation. *Annual Review of Plant Biology* **57**, 431–449.
- Sali A, Blundell TL.** 1993. Comparative protein modelling by satisfaction of spatial restraints. *Journal of Molecular Biology* **234**, 779–815.
- Savelieva EM, Oslovsky VE, Karlov DS, Kurochkin NN, Getman IA, Lomin SN, Sidorov GV, Mikhailov SN, Osolodkin DI, Romanov GA.** 2018. Cytokinin activity of *N*<sup>6</sup>-benzyladenine derivatives assayed by interaction with receptors. *Phytochemistry* **149**, 161–177.
- Schäfer M, Meza-Canales ID, Brütting C, Baldwin IT, Meldau S.** 2015. Cytokinin concentrations and CHASE-DOMAIN CONTAINING HIS KINASE 2 (NaCHK2)- and NaCHK3-mediated perception modulate herbivory-induced defense signaling and defenses in *Nicotiana attenuata*. *New Phytologist* **207**, 645–658.
- Shen M, Sali A.** 2006. Statistical potential for assessment and prediction of protein structures. *Protein Science* **15**, 2507–2524.
- Sparkes IA, Runions J, Kearns A, Hawes C.** 2006. Rapid, transient expression of fluorescent fusion proteins in tobacco plants and generation of stably transformed plants. *Nature Protocols* **1**, 2019–2025.
- Steklov MY, Lomin SN, Osolodkin DI, Romanov GA.** 2013. Structural basis for cytokinin receptor signaling: an evolutionary approach. *Plant Cell Reports* **32**, 781–793.

- Stolz A, Riefler M, Lomin SN, Achazi K, Romanov GA, Schmülling T.** 2011. The specificity of cytokinin signalling in *Arabidopsis thaliana* is mediated by differing ligand affinities and expression profiles of the receptors. *The Plant Journal* **67**, 157–168.
- Suzuki T, Miwa K, Ishikawa K, Yamada H, Aiba H, Mizuno T.** 2001. The *Arabidopsis* sensor Histidine kinase, AHK4, can respond to cytokinins. *Plant and Cell Physiology* **42**, 107–113.
- Takeda S, Fujisawa Y, Matsubara M, Mizuno T.** 2001. A novel feature of the multistep phosphorelay in *Escherichia coli*: a revised model of the RcsC→YojN→RcsB signaling pathway implicated in capsular synthesis and swarming behaviour. *Molecular Microbiology* **40**, 440–450.
- Tamura K, Stecher G, Peterson D, Filipowski A, Kumar S.** 2013. MEGA6: molecular evolutionary genetics analysis version 6.0. *Molecular Biology and Evolution* **30**, 2725–2729.
- Thu NBA, Hoang XLT, Truc MT, Sulieman S, Thao NP, Tran LP.** 2017. Cytokinin signaling in plant response to abiotic stresses. In: Pandey G, Ed. *Mechanism of Plant Hormone Signaling under Stress*. First Edition, vol. 1, chpt. 4. John Wiley & Son, Inc., 71–100.
- Voinnet O, Rivas S, Mestre P, Baulcombe D.** 2003. An enhanced transient expression system in plants based on suppression of gene silencing by the p19 protein of tomato bushy stunt virus. *The Plant Journal* **33**, 949–956.
- Wang B, Chen Y, Guo B, Kabir MR, Yao Y, Peng H, Xie C, Zhang Y, Sun Q, Ni Z.** 2014. Expression and functional analysis of genes encoding cytokinin receptor-like histidine kinase in maize (*Zea mays* L.). *Molecular Genetics and Genomics* **289**, 501–512.
- Wang D, Cheng L, Wang Y, Zhang F.** 2018. Comparative proteomic analysis of potato (*Solanum tuberosum* L.) tuberization in vitro regulated by IAA. *American Journal of Potato Research* <https://doi.org/10.1007/s12230-018-9640-6>.
- Wiederstein M, Sippl MJ.** 2007. ProSA-web: interactive web service for the recognition of errors in three-dimensional structures of proteins. *Nucleic Acids Research* **35** (suppl\_2), W407–W410.
- Wulfetange K, Lomin SN, Romanov GA, Stolz A, Heyl A, Schmülling T.** 2011. The cytokinin receptors of *Arabidopsis* are located mainly to the endoplasmic reticulum. *Plant Physiology* **156**, 1808–1818.
- Yonekura-Sakakibara K, Kojima M, Yamaya T, Sakakibara H.** 2004. Molecular characterization of cytokinin-responsive histidine kinases in maize. Differential ligand preferences and response to cis-zeatin. *Plant Physiology* **134**, 1654–1661.
- Zwack PJ, Rashotte AM.** 2015. Interactions between cytokinin signalling and abiotic stress responses. *Journal of Experimental Botany* **66**, 4863–4871.

**Table 1.** *Proteins and genes predictably related to CK signaling system of potato*

| <b>Protein type</b> | <b>Protein name</b> | <b>Gene ID</b> | <b>mRNA</b>     | <b>Protein</b>  | <b>Protein length, aa</b> |
|---------------------|---------------------|----------------|-----------------|-----------------|---------------------------|
| <b>CHK</b>          | <b>StHK2</b>        | LOC102591086   | XM_015303261.1  | XP_015158747.1  | <b>1263</b>               |
| <b>CHK</b>          | <b>StHK3</b>        | LOC102587294   | XM_006352114.2  | XP_006352176.1  | <b>1032</b>               |
| <b>CHK</b>          | <b>StHK4</b>        | LOC102603756   | XM_006354988.2  | XP_006355050.1  | <b>992</b>                |
| HPt                 | <b>StHP1a</b>       | LOC102590747   | XM_006365209.2  | XP_006365271.1  | <b>151</b>                |
|                     |                     |                | XM_006365208.2  | XP_006365270.1  | <b>151</b>                |
|                     |                     |                | XM_006365207.2  | XP_006365269.1  | <b>151</b>                |
| HPt                 | <b>StHP1b</b>       | LOC102603297   | XM_006352731.2  | XP_006352793.1  | <b>152</b>                |
| HPt                 | <b>StHP1c</b>       | PGSC0003DMG40  | PGSC0003DMT4000 | PGSC0003DMT4000 | <b>148</b>                |
|                     |                     | 0028593        | 73603           | 73603           |                           |
| HPt                 | <b>StHP6</b>        | LOC102601463   | XM_006364157.2  | XP_006364219.1  | <b>156</b>                |
| HPt                 | <b>StHP4a</b>       | LOC102589200   | XM_015304066.1  | XP_015159552.1  | <b>112</b>                |
|                     |                     |                | XM_006364659.2  | XP_006364721.1  | <b>136</b>                |
| HPt                 | <b>StHP4b</b>       | LOC102584884   | XM_015315420.1  | XP_015170906.1  | <b>137</b>                |
| RR-B                | <b>StRR1a</b>       | LOC102578736   | XM_006363517.2  | XP_006363579.1  | <b>675</b>                |
|                     |                     |                | XM_006363518.2  | XP_006363580.1  | <b>675</b>                |
| RR-B                | <b>StRR1b</b>       | LOC102586468   | XM_006345914.1  | XP_006345976.1  | <b>663</b>                |
| RR-B                | <b>StRR1c</b>       | LOC102596771   | XM_006349891.2  | XP_006349953.1  | <b>556</b>                |
| RR-B                | <b>StRR14</b>       | LOC102606335   | XM_006354997.1  | XP_006355059.1  | <b>653</b>                |
|                     |                     |                | XM_006354996.1  | XP_006355058.1  | <b>656</b>                |
| RR-B                | <b>StRR11</b>       | LOC102593308   | XM_006341706.2  | XP_006341768.1  | <b>581</b>                |
|                     |                     |                | XM_006341705.2  | XP_006341767.1  | <b>581</b>                |
|                     |                     |                | XM_015306278.1  | XP_015161764.1  | <b>481</b>                |
| RR-B                | <b>StRR18a</b>      | LOC102598455   | XM_006343619.2  | XP_006343681.1  | <b>681</b>                |
| RR-B                | <b>StRR18b</b>      | LOC102587717   | XM_006350015.2  | XP_006350077.1  | <b>707</b>                |
| ARR19               | <b>StRR19</b>       | LOC107060895   | XM_015309426.1  | XP_015164912.1  | <b>371</b>                |
| RR-A                | <b>StRR4</b>        | LOC102602758   | XM_015313344.1  | XP_015168830.1  | <b>248</b>                |
| RR-A                | <b>StRR9a</b>       | LOC102590336   | XM_006355533.2  | XP_006355595.1  | <b>163</b>                |
| RR-A                | <b>StRR9b</b>       | LOC102588738   | XM_015314746.1  | XP_015170232.1  | <b>214</b>                |
|                     |                     |                | XM_015314747.1  | XP_015170233.1  | <b>211</b>                |
| RR-A                | <b>StRR9c</b>       | LOC102599826   | XM_006351210.2  | XP_006351272.1  | <b>226</b>                |
| RR-A                | <b>StRR9d</b>       | LOC102601166   | XM_006351214.2  | XP_006351276.1  | <b>226</b>                |
| RR-A                | <b>StRR8</b>        | LOC102588738   | XM_015314747.1  | XP_015170233.1  | <b>211</b>                |
|                     |                     |                | XM_015314746.1  | XP_015170232.1  | <b>214</b>                |
| RR-A                | <b>StRR15</b>       | LOC102605280   | XM_006344933.2  | XP_006344995.1  | <b>202</b>                |
| RR-A                | <b>StRR17</b>       | LOC102583233   | XM_006357236.2  | XP_006357298.1  | <b>156</b>                |
| RR-C                | <b>StRR22a</b>      | LOC107058083   | XM_015303399.1  | XP_015158885.1  | <b>186</b>                |
| RR-C                | <b>StRR22b</b>      | LOC107058085   | XM_015303400.1  | XP_015158886.1  | <b>184</b>                |
| RR-C                | <b>StRR22c</b>      | LOC107059982   | XM_015307157.1  | XP_015162643.1  | <b>137</b>                |
| RR-C                | <b>StRR22d</b>      | LOC102580685   | XM_006361561.2  | XP_006361623.2  | <b>115</b>                |

Nomenclature of the NCBI database is used, except StHP1c found only in the Phytozome database. Number of RNA entries exceeds that of proteins due to alternative splicing. Data corresponding to CK receptor proteins/genes and response regulator type A proteins/genes studied in this work are highlighted.



**Table 2.** Putative CK receptor genes in potato genomes and encoded proteins

| Receptor clade      | Putative CK receptors of potato plants: |                            | SNP number in putative CK receptor genes/proteins of cv. Désirée vs var. Phureja: |                 | Number of Désirée cDNA clones |
|---------------------|-----------------------------------------|----------------------------|-----------------------------------------------------------------------------------|-----------------|-------------------------------|
|                     | Phureja*<br>(length, aa)                | Désirée **<br>(length, aa) | DNA bases                                                                         | Amino acids     |                               |
| HK2 orthologs       | StHK2<br>(1263 aa)                      | StHK2a (1263 aa)           | 5 SNPs                                                                            | 3 SNPs          | 17                            |
|                     |                                         | StHK2b (1263 aa)           | 4 SNPs                                                                            | 2 SNPs          | 17                            |
| HK3 orthologs       | StHK3<br>(1032 aa)                      | StHK3a (1032 aa)           | No SNP                                                                            | No SNP          | 6                             |
|                     |                                         | StHK3b (1031 aa)           | 20 SNPs, 3 del.                                                                   | 9 SNPs, 1 del.  | 3                             |
| CRE1/AHK4 orthologs | StHK4<br>(992 aa)                       | StHK4a (992 aa)            | No SNP                                                                            | No SNP          | 1                             |
|                     |                                         | StHK4b (991 aa)            | 28 SNPs, 3 del.                                                                   | 13 SNPs, 1 del. | 9                             |

\*Doubled monoploid, method: total genome sequencing.

\*\* Autotetraploid, method: PCR with cDNA as a template.

**Table 3.** *The affinity ( $K_d$ ) of various CKs for putative potato receptors*

| Cytokinin                                 | Abbreviation | Apparent $K_d$ (nM) for putative receptors: |                      |          |          |
|-------------------------------------------|--------------|---------------------------------------------|----------------------|----------|----------|
|                                           |              | StHK2a                                      | StHK3a <sub>SM</sub> | StHK4a   | StHK4b   |
| <i>trans</i> -Zeatin                      | <b>tZ</b>    | 2.6±0.3                                     | 4.7±0.6              | 2.5±0.7  | 3.0±0.3  |
| <i>cis</i> -Zeatin                        | <b>cZ</b>    | 102±7                                       | 110±39               | 106±22   | 129±19   |
| <i>N</i> <sup>6</sup> -Isopentenyladenine | <b>iP</b>    | 2.4±0.2                                     | 5.2±0.8              | 2.1±0.2  | 2.5±0.3  |
| Dihydrozeatin                             | <b>DZ</b>    | 169±18                                      | 21±3                 | 178±37   | 227±33   |
| <i>N</i> <sup>6</sup> -Benzyladenine      | <b>BA</b>    | 45±3.5                                      | 49±7                 | 55±7     | 63±12    |
| Thidiazuron                               | <b>TZ</b>    | 1.40±0.04                                   | 2.3±0.5              | 12.6±1.9 | 17.2±2.5 |

## Figure legends

**Fig. 1.** Phylogenetic tree of CK receptors. Species are: StHK2-4, *Solanum tuberosum*; SlHK2-4, *Solanum lycopersicum*; AtHK2-4, *Arabidopsis thaliana*; OsHK3,4,6, *Oryza sativa*; AmbtriHK2,3, *Amborella trichopoda*; PITA 000007449 and PITA 000016046, *Pinus taeda*; MA 101803g0010 and MA 47453g0010, *Picea abies*; CRE1,2-1,2-2, *Selaginella moellendorffii*; CHK1-3, *Physcomitrella patens*. SP – seed plants, Lyco – Lycophyta, Bryo – Bryophyta. Parameters of ClustalW algorithm were: phylogeny test – bootstrap method, no. of bootstrap replications – 100, substitutions type – amino acid, model – equal input model, rates among sites – gamma distributed, no of discrete gamma categories – 3, gaps/missing data treatment – complete deletion, ML heuristic method – subtree-pruning – regrafting.

**Fig. 2.** Module/domain structures of the predicted potato CK receptors. Protein domains: TM, transmembrane segment; DI, dimerization interface; CHASE, Cyclase/Histidine kinases Associated Sensory domain (Steklov *et al.*, 2013); HisKA, histidine kinase A domain; HATPase, adenosine triphosphatase domain; Rec-like, receiver-like domain; Rec, receiver domain. Conserved amino acids and consensus motifs (N, G1, F, G2) are indicated. According to conventional terminology, the catalytic module consists of dimerization and histidine phosphotransfer domain (DHpD), and catalytic and ATP-binding domain (CAD) (Mayerhofer *et al.*, 2015; Pekárová *et al.*, 2016). Scales at the bottom of the structures indicate the length in aa number.

**Fig. 3.** CK receptor sequence alignment. Consensus motifs and conserved aa are marked. AHK and OsHK correspond to Arabidopsis and rice proteins, respectively. Numbers of not shown aa are indicated in brackets.

**Fig. 4.** Homology models for predicted potato CK receptor domains. Sensor modules and HisKA domain are presented as dimers where one of subunits is colored grey. Positions of hormone, ATP and phosphoaccepting His/Asp residues are highlighted (red). Green spheres represent Mg<sup>2+</sup> ions.

**Fig. 5.** pH dependencies of *trans*-zeatin binding to putative potato CK receptors.

**Fig. 6.** CK receptors of potato feed MSP signaling pathway in  $\Delta$ RcsC *E. coli* cells.

**Fig. 7.** Organ-dependent (A) and clade-dependent (B) patterns of expression of CK receptors in potato plants cultivated on media with different % sucrose. Relative transcript copy number is given as % of the total transcript amount in each plot, taken as 100%. Different letters (a, b, c) indicate significant differences at  $P < 0.05$ .

**Fig. 8.** Degrees of transcription induction (BA/control) of CK receptor (top) and response regulator type A (bottom) genes after 1 h treatment of potato plants with 1  $\mu$ M BA. Plants were grown on MS medium with 1.5% sucrose for 5-6 weeks under standard LD conditions. L, S, R signify leaves, stems and roots,

respectively. More than two-fold prevalence of transcripts in BA-treated over control plants is considered as significant induction, bars corresponding to induced genes are outlined red.

**Fig. 9.** CK-responsive *cis*-regulatory elements in promoters of CK receptor genes (upper part) and response regulators type A genes (lower part) of potato. Elements are shown on both DNA strands. Promoter area proximal to transcription start is boxed.

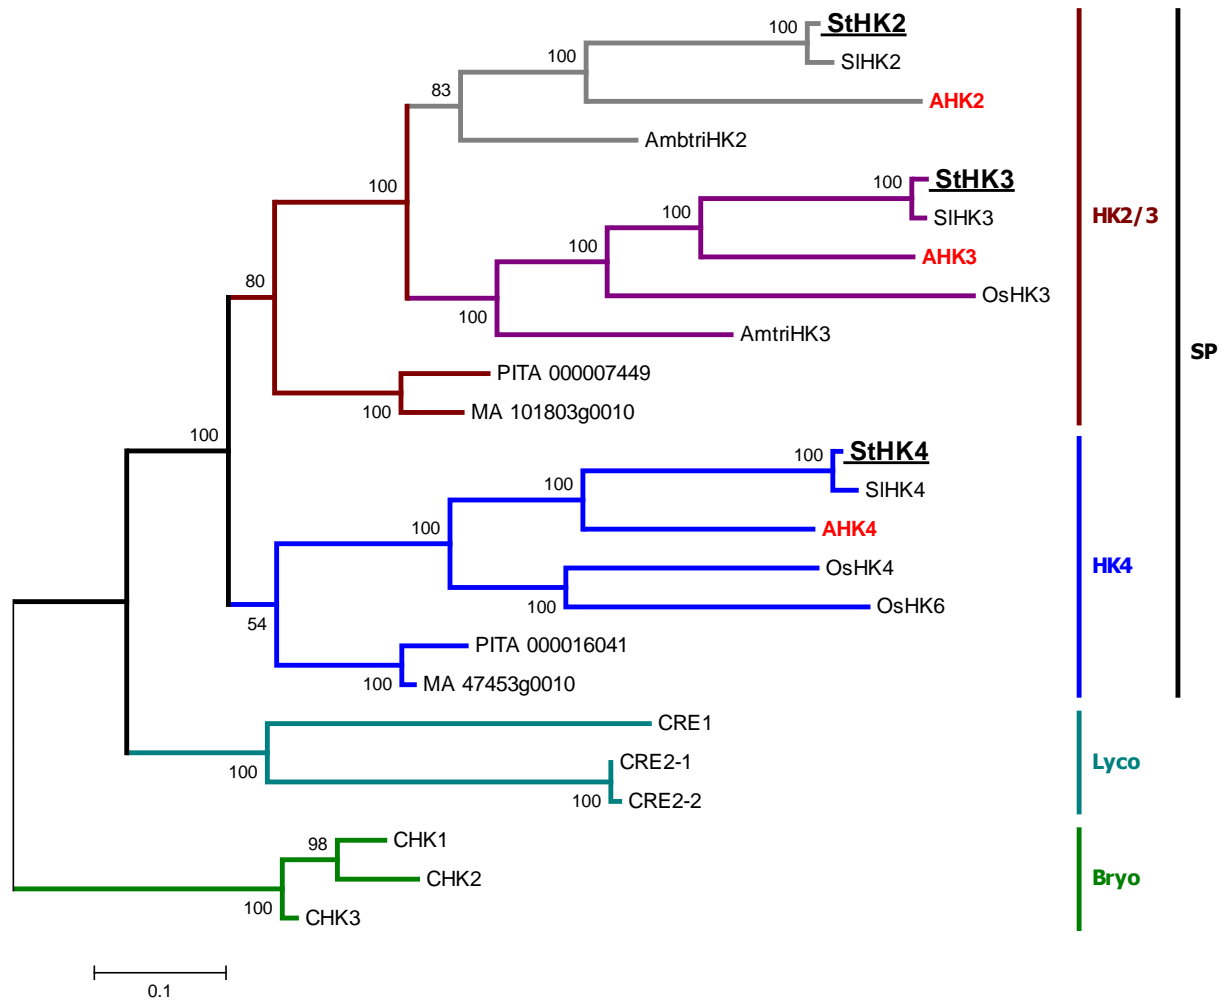

**Fig. 1.** Phylogenetic tree of CK receptors. Species are: StHK2-4, *Solanum tuberosum*; SIHK2-4, *Solanum lycopersicum*; AHK2-4, *Arabidopsis thaliana*; OsHK3,4,6, *Oryza sativa*; AmbtriHK2,3, *Amborella trichopoda*; PITA 000007449 and PITA 000016046, *Pinus taeda*; MA 101803g0010 and MA 47453g0010, *Picea abies*; CRE1,2-1,2-2, *Selaginella moellendorffii*; CHK1-3, *Physcomitrella patens*. SP – seed plants, Lyco – Lycophyta, Bryo – Bryophyta. Parameters of ClustalW algorithm were: phylogeny test – bootstrap method, no. of bootstrap replications – 100, substitutions type – amino acid, model – equal input model, rates among sites – gamma distributed, no of discrete gamma categories – 3, gaps/missing data treatment – complete deletion, ML heuristic method – subtree-pruning – regrafting.

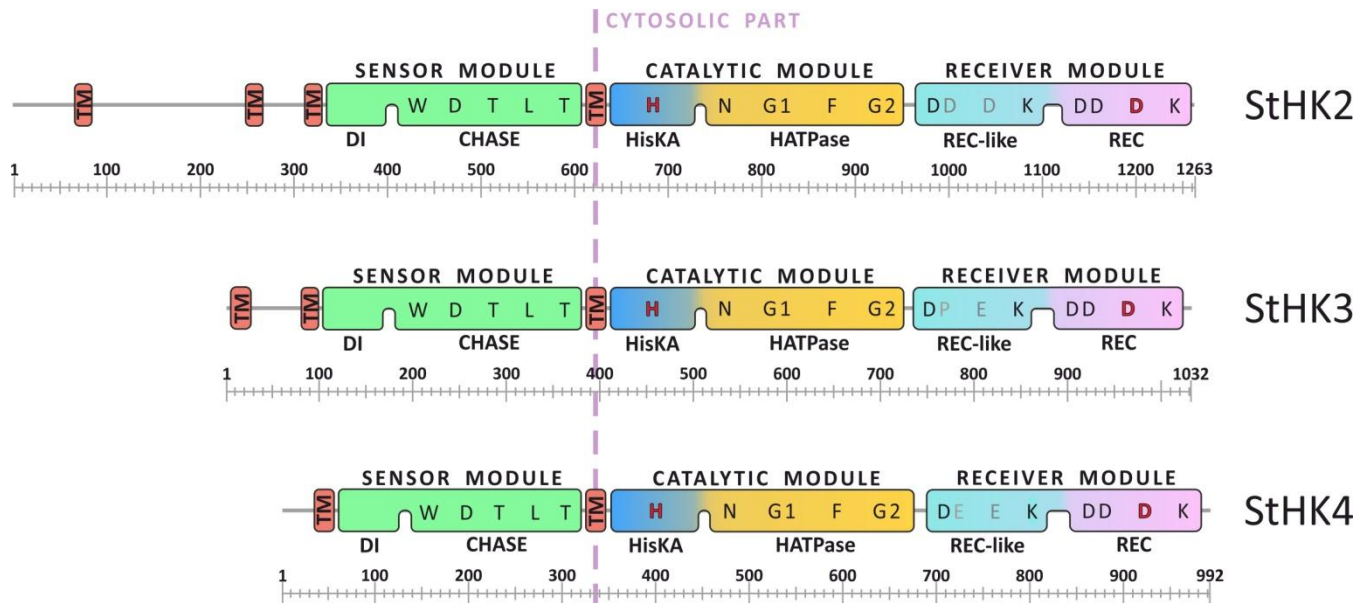

**Fig. 2.** Module/domain structures of the predicted potato CK receptors. Protein domains: TM, transmembrane segment; DI, dimerization interface; CHASE, Cyclase/Histidine kinases Associated Sensory domain; HisKA, histidine kinase A domain; HATPase, adenosine triphosphatase domain; Rec-like, receiver-like domain; Rec, receiver domain. Conserved amino acids and consensus motifs (N, G1, F, G2) are indicated. According to conventional terminology, the catalytic module consists of dimerization and histidine phosphotransfer domain (DHpD), and catalytic and ATP-binding domain (CAD) (Mayerhofer *et al.*, 2015; Pekárová *et al.*, 2016). Scales at the bottom of the structures indicate the length in aa number.

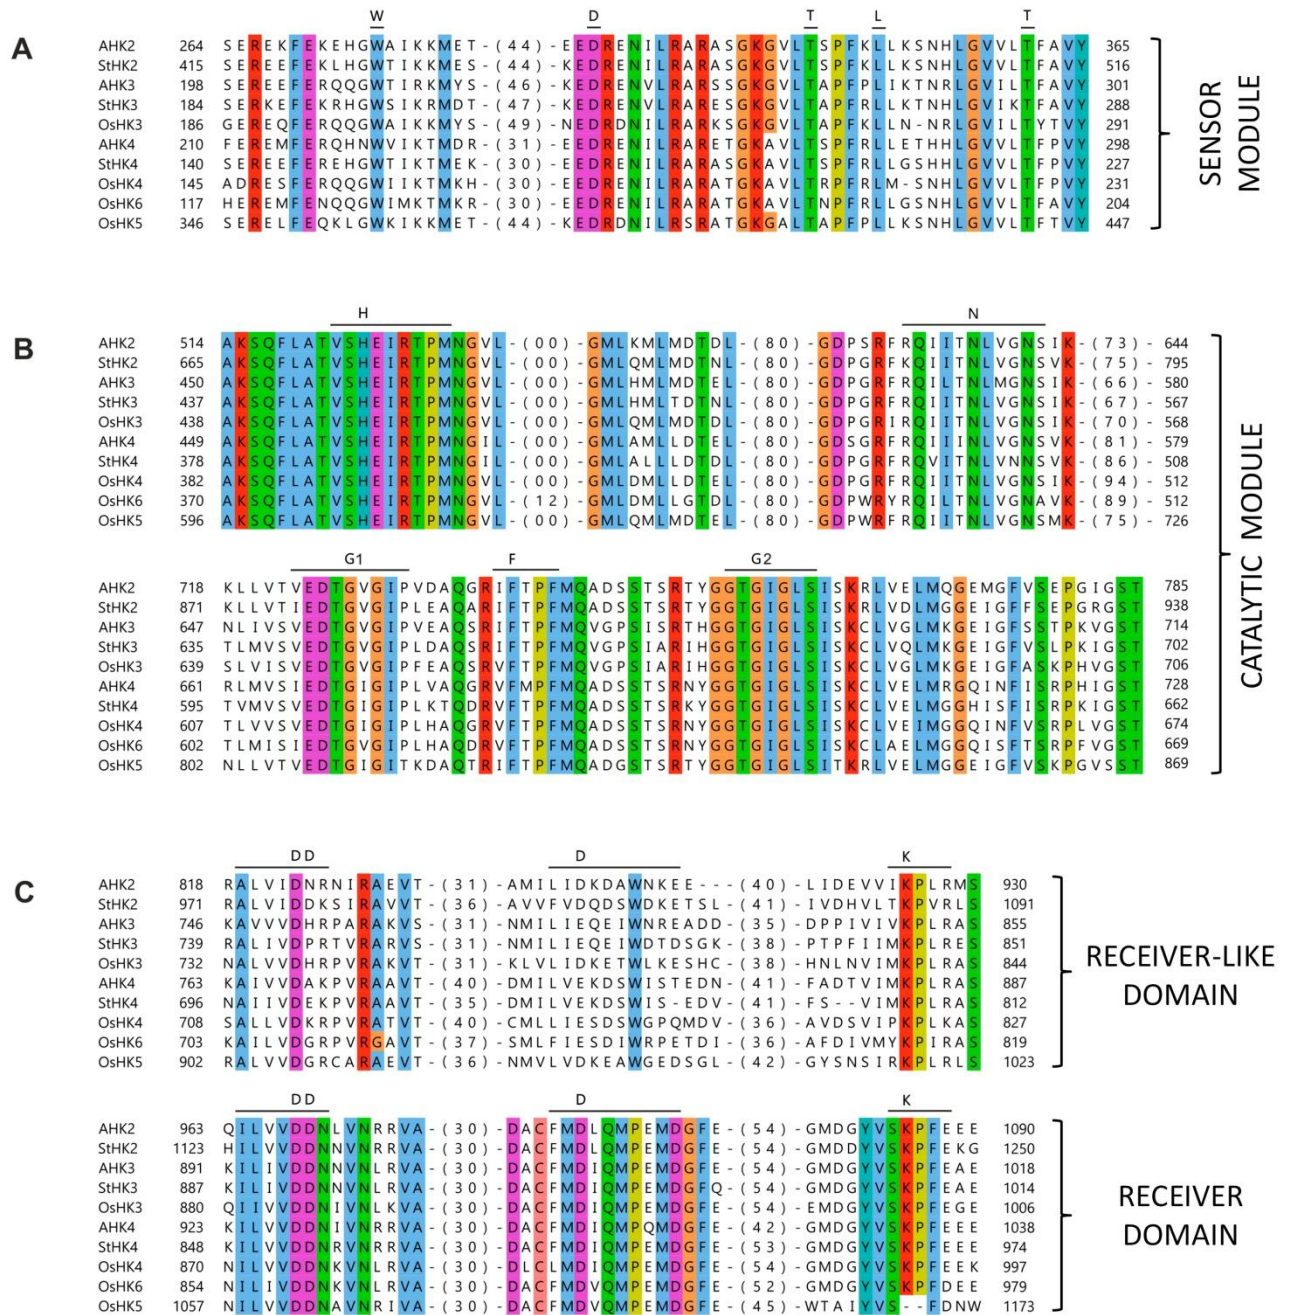

**Fig. 3.** CK receptor sequence alignment. Consensus motifs and conserved amino acids are marked. AHK and OsHK correspond to Arabidopsis and rice proteins, respectively. Numbers of not shown amino acids are indicated in brackets.

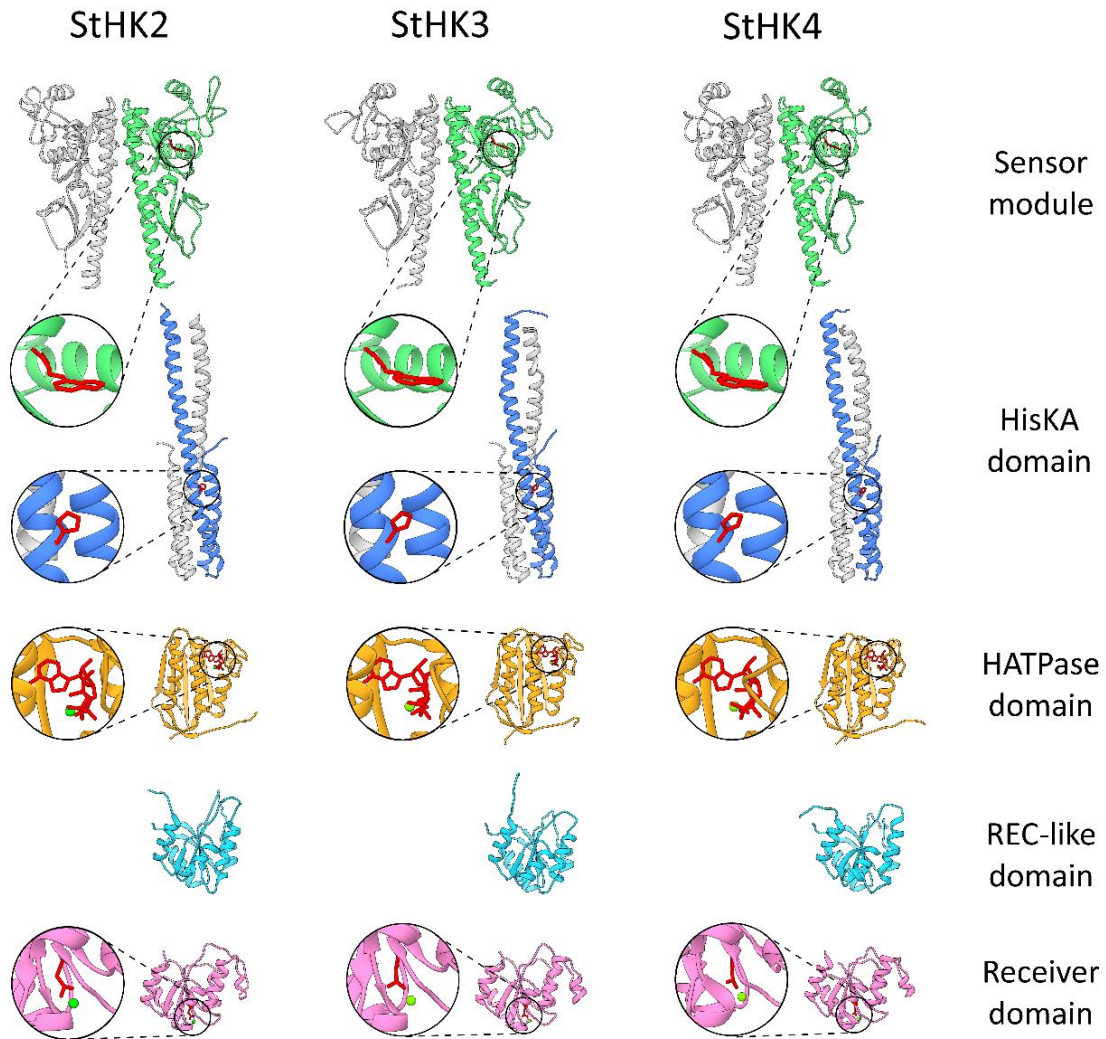

**Fig. 4.** Homology models for predicted potato CK receptor domains. Sensor modules and HisKA domains are presented as dimers where one of subunits is colored grey. Positions of hormone, ATP and phosphoaccepting His/Asp residues are highlighted. Green spheres represent  $Mg^{2+}$  ions.



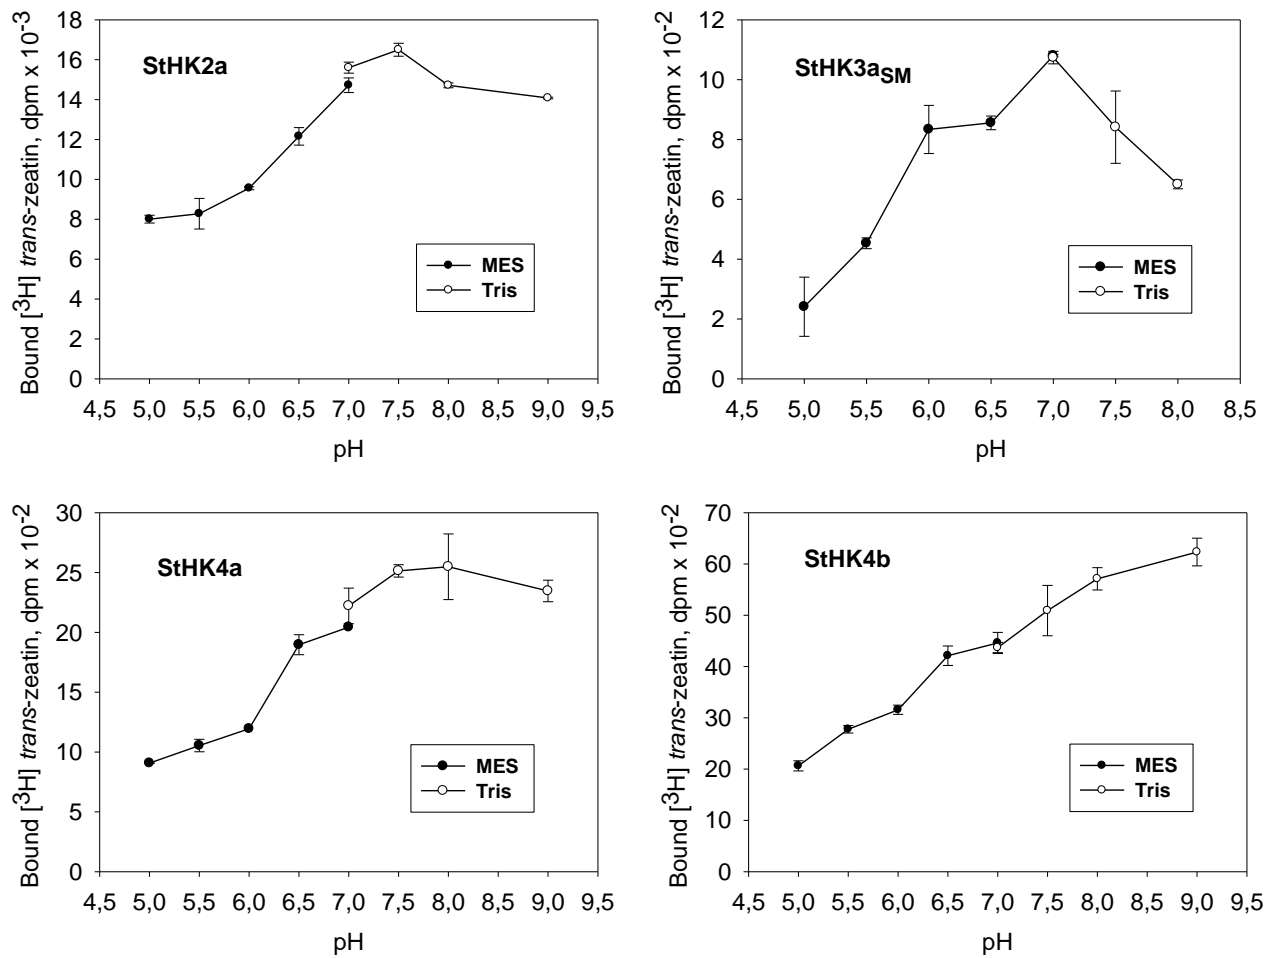

**Fig. 5.** pH dependencies of *trans*-zeatin binding to putative potato CK receptors.

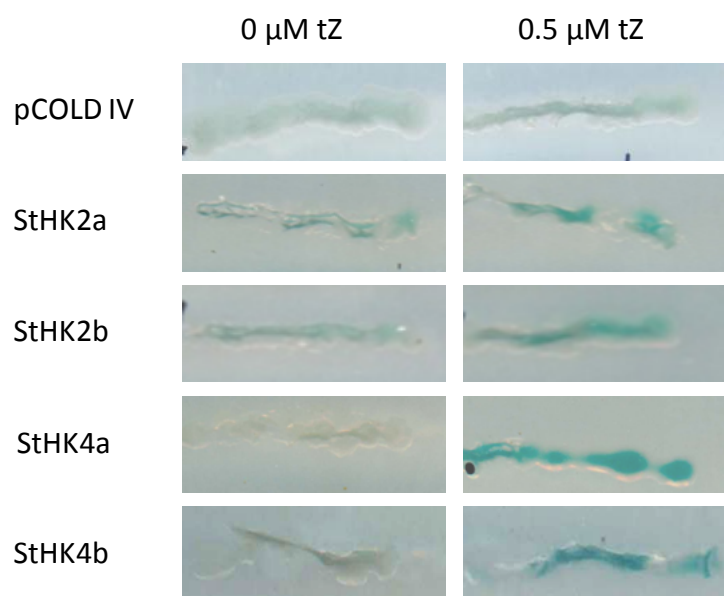

**Fig. 6.** CK receptors of potato feed MSP signaling pathway in  $\Delta$ RcsC *E. coli* cells.

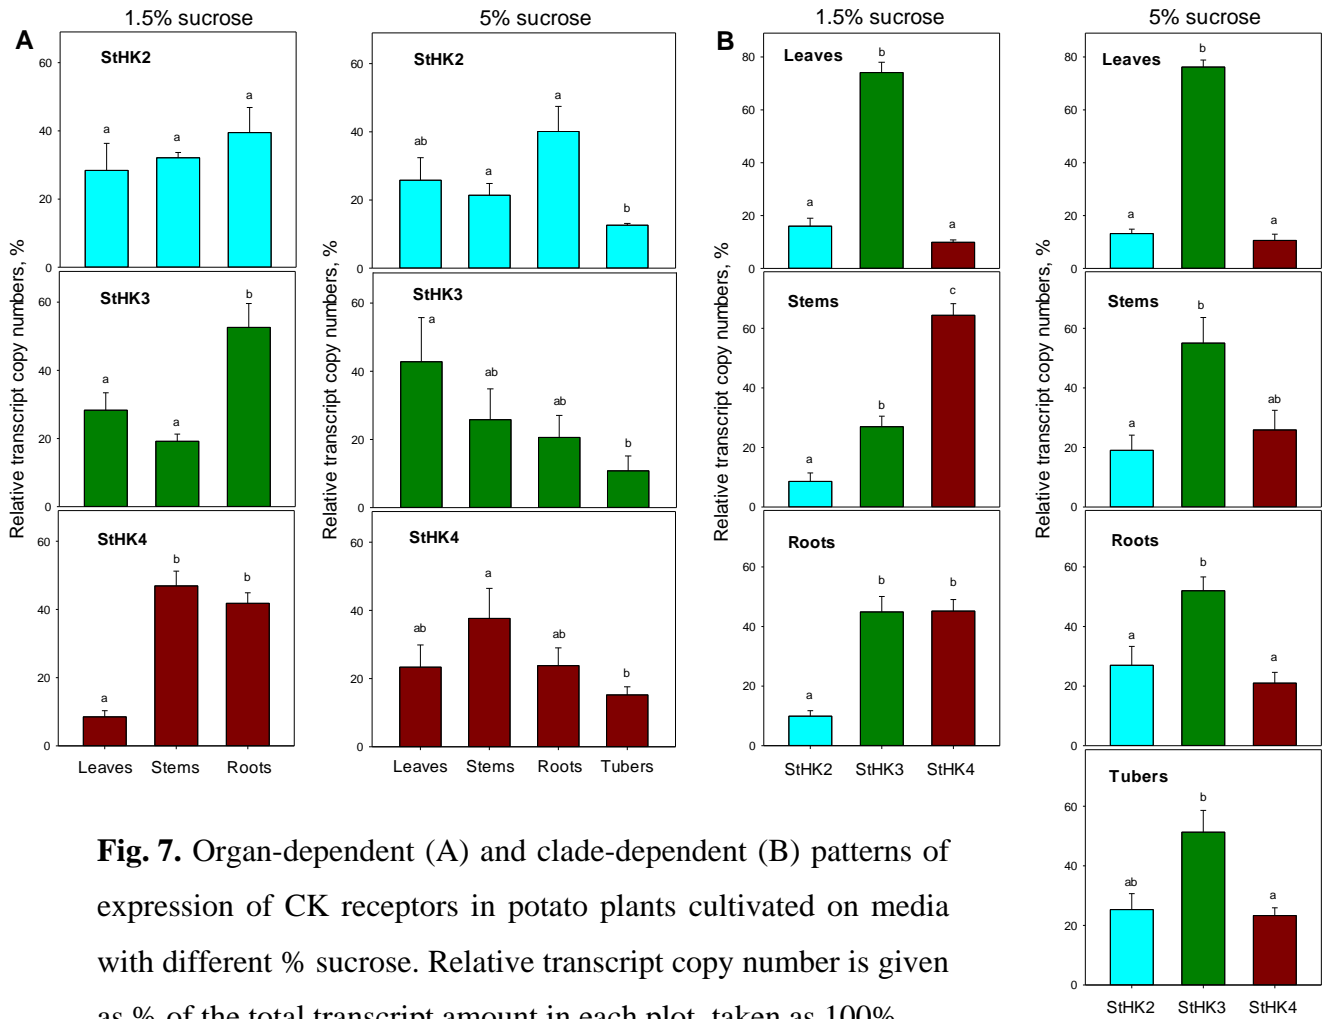

**Fig. 7.** Organ-dependent (A) and clade-dependent (B) patterns of expression of CK receptors in potato plants cultivated on media with different % sucrose. Relative transcript copy number is given as % of the total transcript amount in each plot, taken as 100%.

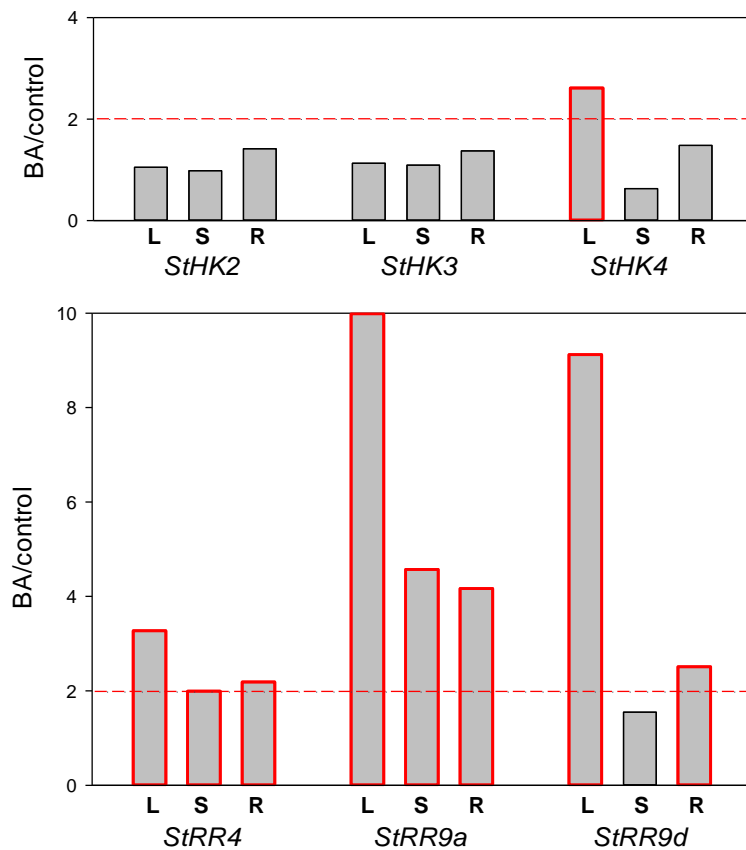

**Fig. 8.** Degrees of transcription induction (BA/control) of CK receptor (top) and response regulator type A (bottom) genes after 1 h treatment of potato plants with 1  $\mu$ M BA. Plants were grown on MS medium with 1.5% sucrose for 5-6 weeks under standard LD conditions. L, S, R signify leaves, stems and roots, respectively. More than two-fold prevalence of transcripts in BA-treated over control plants is considered as significant induction, bars corresponding to induced genes are outlined red.

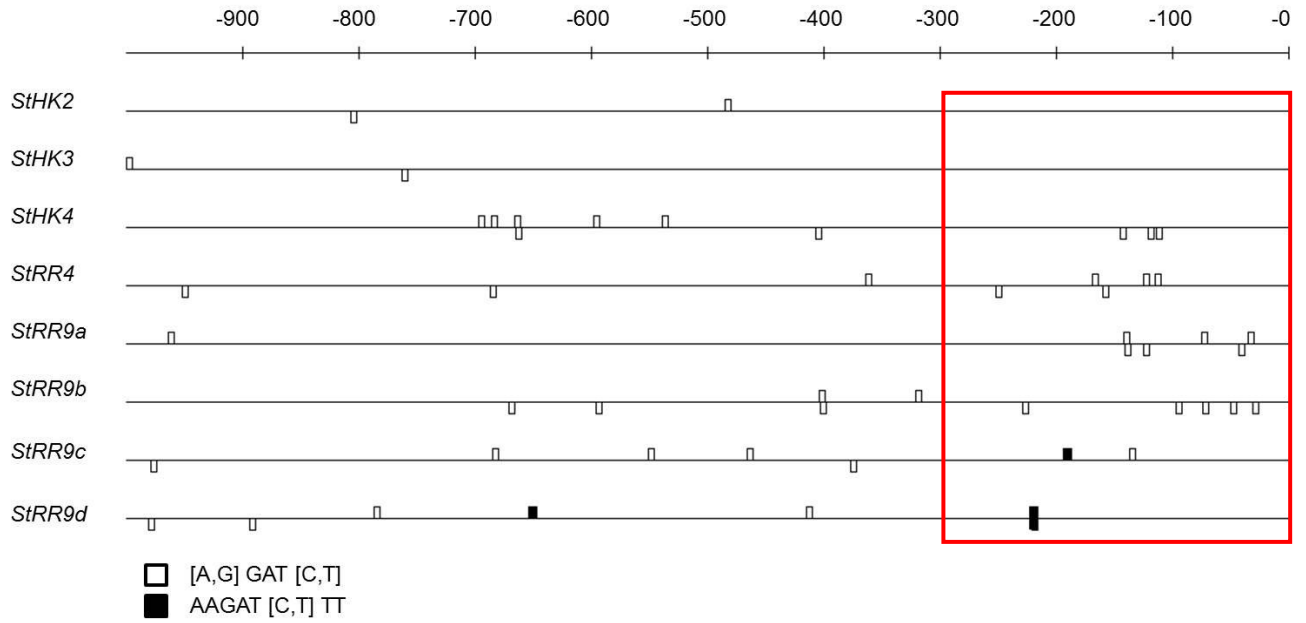

**Fig. 9.** CK-responsive *cis*-regulatory elements in promoters of CK receptor genes (upper part) and response regulators type A genes (lower part) of potato. Elements are shown on both DNA strands. Promoter area proximal to transcription start is boxed.

512 **SUPPLEMENTARY DATA**

513 **Supplementary tables**

514

515 **Table S1.** Sequence identity of modeled receptor domains and respective templates

| Domain               | Template |           | Receptor | Identity,<br>% | Reference                             |
|----------------------|----------|-----------|----------|----------------|---------------------------------------|
|                      | PDB ID   | Protein   |          |                |                                       |
| Sensory module       | 3T4L_A   | AHK4      | StHK2    | 64.75          | Hothorn <i>et al.</i> , 2011          |
|                      |          |           | StHK3    | 65.00          |                                       |
|                      |          |           | StHK4    | 79.62          |                                       |
| HisKA domain         | 4MT8_A   | ERS1      | StHK2    | 36.99          | Mayerhofer <i>et al.</i> , 2015       |
|                      |          |           | StHK3    | 34.72          |                                       |
|                      |          |           | StHK4    | 38.20          |                                       |
| ATPase domain        | 4PL9_A   | ETR1      | StHK2    | 34.94          | Mayerhofer <i>et al.</i> , 2015       |
|                      |          |           | StHK3    | 32.74          |                                       |
|                      |          |           | StHK4    | 31.55          |                                       |
|                      | 5IDM_A   | CckA      | StHK2    | 19.88          | Dubey <i>et al.</i> , 2016            |
|                      |          |           | StHK3    | 22.42          |                                       |
|                      |          |           | StHK4    | 22.70          |                                       |
| Receiver domain      | 3MMN_A   | CKI1      | StHK2    | 48.21          | Pekárová <i>et al.</i> , 2011         |
|                      |          |           | StHK3    | 43.64          |                                       |
|                      |          |           | StHK4    | 48.78          |                                       |
|                      | 4EUK_A   | AHK5/CKI2 | StHK2    | 32.52          | Bauer <i>et al.</i> , 2013            |
|                      |          |           | StHK3    | 31.88          |                                       |
|                      |          |           | StHK4    | 32.37          |                                       |
| Receiver-like domain | 1DCF_A   | ETR1      | StHK2    | 25.00          | Müller-Dieckmann <i>et al.</i> , 1999 |
|                      |          |           | StHK3    | 15.45          |                                       |
|                      |          |           | StHK4    | 21.77          |                                       |

516

517

518 **Table S2.** List of primers used in this research

| <b>Primer pair name</b>  | <b>Single primer name</b> | <b>Primer sequences (5' – 3')</b>               |
|--------------------------|---------------------------|-------------------------------------------------|
| StHK2_cloning            | StHK2_LP1                 | GCTTTTCTGCTCTGGGTG                              |
|                          | StHK2_RP3                 | TCAACCTGACCCGAAGAAG                             |
| StHK3_cloning            | StHK3_LP1                 | GGGTTTGGTTTGAAATTGGG                            |
|                          | StHK3_RP3                 | GGTATTCTGAGTTGGCTTG                             |
| StHK4_cloning            | StHK4_LP1                 | ATGGGTGAGAAGATGCAAAGCC                          |
|                          | StHK4_RP3                 | CTATTTGTCCGAGTTAGGCTTGG                         |
| StHK2_sensor module      | StHK2_attB1<br>CHASE      | TACAAAAAAGCAGGCTTGATGGCTCTTGTTATCTTTGTTATTG     |
|                          | StHK2_attB2<br>CHASE      | ACAAGAAAGCTGGGTAAGCATGGAAGATATGACC              |
| StHK3_sensor module      | StHK3_attB1<br>CHASE      | TACAAAAAAGCAGGCTTGATGCTTTTGATAGTATG             |
|                          | StHK3_attB2<br>CHASE      | ACAAGAAAGCTGGGTAAAATATTTGCCCTATAAGC             |
| StHK2_full length        | StHK2_attB1               | TACAAAAAAGCAGGCTTGATGAGCTTTTCTGCTCTGGGTG        |
|                          | StHK2_attB2               | ACAAGAAAGCTGGGTAACCTGACCCGAAGAAG                |
| StHK3_full length        | StHK3_attB1               | TACAAAAAAGCAGGCTTGATGAGTTTGTTCATGTTATTGGG       |
|                          | StHK3_attB2               | TTTGGTTTGAAA<br>ACAAGAAAGCTGGGTAGGTATTCTGAGTTGG |
| GATEWAY_standard primers | attB1                     | GGGACAAGTTTGTACAAAAAAGCAGGCT                    |
|                          | attB2                     | GGGACCACTTTGTACAAGAAAGCTGGGTA                   |
| StHK4_truncated          | StHK4_BcuI                | ACTAGTATGGGTGAGAAGATGCAAAGCC                    |
|                          | StHK4_EcoRI               | AGGAATTCCAAGTCTCTTCAGATGGTATC                   |
| StHK2_COLD               | StHK2_XhoI                | ATATCTCGAGATGAGCTTTTCTGCTCTGGG                  |
|                          | StHK2_NheI                | TATGCTAGCTCAACCTGACCCGAAGAAGC                   |
| StHK4_COLD               | StHK4_SacI                | AAAGAGCTCATGGGTGAGAAGATGCAAAGCC                 |
|                          | StHK4_EcoR1a              | GAATTCCTATTTGTCCGAGTTAGGCTTGG                   |
| StHK2_qRT PCR(1)         | StHK2_FPq1                | ACCATTTCAGAGACTGGGA                             |
|                          | StHK2_RPq1                | GGTCAACAAAAACCACGGCTA                           |
| StHK3_qRT PCR(1)         | StHK3_FPq1                | CACAGCTCCCTTCAGGCTAC                            |
|                          | StHK3_RPq1                | TACTCCACCAAGGTACCCGT                            |
| StHK4_qRT PCR(2)         | StHK4_FPq2                | TGCTGAGAGTGGGAAAGCTG                            |
|                          | StHK4_RPq2                | GACGTGTAGCCTCAAACCCA                            |
| StRR4A                   | StRR4A_FPq1               | ATCAACACCTTCACCGCCAT                            |
|                          | StRR4A_RPq1               | TTGAGTCGTCTTGTTGGCGA                            |
| StRR9A                   | StRR9A_FPq2               | CCTCTTATCAAGTTACTGTTGTGGA                       |
|                          | StRR9A_RPq2               | ACCAGTCATTCAGGCATGCTA                           |
| StRR9D                   | StRR9D_FPq1               | CCTAGCAACCAACAGGAAGTG                           |
|                          | StRR9D_RPq1               | TGTTCCCTCAGAGATGCAGATTCC                        |
| EF1_AB061263             | EF1_FP                    | ATTGGAAACGGATATGCTCCA                           |
|                          | EF1_RP                    | TCCTTACCTGAACGCCTGTCA                           |
| CYC_AF126551             | CYC_FP                    | CTCTTCGCCGATACCACTCC                            |
|                          | CYC_RP                    | TCACACGGTGGGAAGGTTGAG                           |
